**Sex-specific blood-brain barrier alterations and vascular biomarkers underlie chronic stress responses in mice and human depression.**

Laurence Dion-Albert<sup>1</sup>, Alice Cadoret<sup>1</sup>, Ellen Doney<sup>1</sup>, Fernanda Neutzling Kaufmann<sup>1</sup>, Katarzyna A. Dudek<sup>1</sup>, Lyonna F. Parise<sup>2</sup>, Flurin Cathomas<sup>2</sup>, Nalia Samba<sup>3</sup>, Natalie Hudson<sup>4</sup>, Manon Lebel<sup>1</sup>, Signature Consortium<sup>5</sup>, Matthew Campbell<sup>4</sup>, Gustavo Turecki<sup>6</sup>, Naguib Mechawar<sup>6</sup>, Caroline Menard<sup>1\*</sup>

**Prevalence, symptoms, and treatment of depression all point toward major sex differences. Social stress-induced neurovascular pathology is associated with depressive symptoms in male mice however it remains unknown if it contributes to this sexual dimorphism. Here, we report that chronic social and subchronic variable stress promoted sex-specific blood-brain barrier (BBB) molecular and morphological alterations in mood-related brain regions. Viral-mediated functional manipulation leading to a targeted disruption of the BBB induced anxiety- and depression-like behaviors including social avoidance and anhedonia. Endothelium cell-specific transcriptomic profiling revealed key pathways and novel genes involved in maladaptive stress responses vs resilience. We also confirmed BBB leakiness in the brain of stressed females which led us to explore and identify circulating vascular biomarkers of chronic stress that could inform on diagnosis and treatment. Importantly, these pre-clinical findings were validated in human blood and *postmortem* brain samples from depressed women, thus highlighting their translational value. By revealing a sex-specific causal role of BBB dysfunction in stress responses and depression, our results implicate vascular impairment as a major factor underlying mood disorders.**

## Main

Major depressive disorder (MDD) is the most prevalent mood disorder and the leading cause of disability worldwide<sup>1,2</sup>. In parallel, cardiovascular diseases are the main cause of years of life lost<sup>3</sup> highlighting the burden of these conditions. Prevalence of MDD is two to three-fold higher in patients suffering from cardiovascular diseases and it is associated with increased risk of morbidity and mortality<sup>1,4-6</sup>. We previously reported that chronic social stress alters blood-brain barrier (BBB) integrity promoting depression-like behaviors in male mice<sup>7,8</sup>, indicating a direct link between neurovascular health and stress vulnerability. MDD is more frequent in women, who report higher levels of stress in daily life (*American Psychological Association*), the main environmental risk factor to develop depression<sup>1</sup>. Prevalence, symptoms, and treatment of MDD all point toward major sex differences with women more likely to experience comorbid anxiety, sadness, and social impairment<sup>9-11</sup>. However, it is yet unknown if chronic stress induces sex-specific neurovascular changes that could contribute to depression pathogenesis. MDD is an emerging nontraditional risk factor to develop cardiovascular diseases in women, particularly among young women which have higher rates of depression<sup>12</sup>, nevertheless underlying mechanisms have yet to be determined<sup>13</sup>.

Here we evaluated the effect of chronic social defeat stress (CSDS)<sup>14</sup> and chronic variable stress (CVS)<sup>15</sup>, two mouse models of depression, on BBB-related gene expression, morphology and function. Chronic social stress is a prominent contributor to mood disorder prevalence and suicide attempts in victims of bullying<sup>16</sup>. Female rodents are more vulnerable to unpredictable stressors and develop anxiety- and depression-like behaviors after only 6 days (subchronic variable stress, SCVS) while males do not<sup>15</sup>, allowing the identification of promising sex-specific targets. The BBB is formed by endothelial cells sealed by tight junction proteins, pericytes and astrocytes,

and prevents potentially harmful signals in the blood from entering the brain<sup>17</sup>. The development of new and better targeted antidepressant drugs has been hampered by this barrier. Furthermore, its involvement in stress responses remains understudied, particularly when it comes to understanding sex and individual differences in BBB properties<sup>18</sup> as potentially associated to stress resilience vs vulnerability. To address these gaps, the present study using complementary mouse models of depression combined behavioral, molecular, morphological, and viral-mediated loss-of-function experiments with endothelium-specific transcriptomic profiling to investigate vascular alterations underlying stress vulnerability vs resilience and gain mechanistic insights. Our results provide the first characterization and functional interrogation, in a sex-, region- and cell-specific manner, of the role played by the endothelium in chronic stress responses in mice as well as in postmortem brain samples from MDD patients. We also identify sex-specific circulating vascular biomarkers in MDD patients that could help better diagnose and inform novel treatment strategies for depressive disorders.

### **Social stress induces sex-specific regional neurovascular alterations in female mice and depressed women.**

In rodents, CSDS induces a depression-like phenotype mimicking human symptoms such as social avoidance, anhedonia, or anxiety in a subset of mice identified as stress-susceptible (SS)<sup>14</sup>. In the modified CSDS protocol, female C57BL/6J mice are exposed daily (10 min/day) to bouts of social defeat by a larger, physically aggressive CD-1 male mouse (**Fig.1a**), after application of male CD-1 urine on the vagina, tail base and upper back of the female<sup>19</sup>. Male urine is essential to initiate aggression towards females and parallels the classic male/male 10-d CSDS paradigm. A social interaction (SI) test is performed 24h after the last exposure to social stress and

defeated mice that do not display social avoidance are considered resilient (RES) (**Fig.1b**, **Extended Fig.1a-b**,  $P < 0.0001$ ). First, we aimed to identify individual differences in the neurovasculature potentially underlying stress responses in SS vs RES females. Transcriptional profiling of genes associated with vascular integrity, permeability, angiogenesis, tight junctions, and BBB formation was performed in the nucleus accumbens (NAc) of unstressed control (CTRL), SS and RES mice after 10-d CSDS (**Fig.1c**; quantitative PCR primers are listed in **Supplementary Table 1**). Indeed, the NAc plays crucial roles in reward processing, stress responses and mood disorders, including MDD<sup>20</sup>, and we recently reported that the vasculature of this brain region is altered in SS males<sup>7</sup>. In contrast to their male counterparts, we did not observe significant changes for BBB-related gene expression in the NAc of females (**Fig.1c**, **Extended Fig.1c**), including for the tight junction *cldn5* (**Fig.1d**), a gatekeeper of BBB permeability associated with depression-like behaviours in male mice<sup>7</sup>. MDD clinical features are characterized by sexual disparities as well as sex-specific regional transcriptional signatures<sup>9</sup>, thus, we explored if the neurovasculature could be affected in another mood-related hub, the prefrontal cortex (PFC). This brain region is involved in social behaviours, executive function and decision making<sup>20</sup>. Major alterations were observed in the PFC of stressed females (**Fig.1e**, **Extended Fig.1d**) including a ~50% loss of *cldn5* for SS mice (**Fig.1f**,  $P = 0.0042$ ). This vascular change is sex-specific given that no difference was noted in the PFC of stressed males<sup>7</sup>. Since various models of CSDS have been developed for females in recent years, we confirmed that vascular alterations are also present in a different social defeat paradigm. In this protocol, male aggression towards females is initiated through chemogenetic activation of the ventrolateral subdivision of the ventromedial hypothalamus (**Extended Fig.2a**)<sup>21</sup>. Behavioral phenotyping of female mice exposed to this 10-d social defeat paradigm using the SI test revealed two subpopulations of stressed animals, SS and RES mice

(**Extended Fig.2b**,  $P < 0.0001$ ), as observed with the other paradigm described above. Stress susceptibility was again associated with a loss of *cldn5* in mood-related brain regions, including the PFC (**Extended Fig.2c**,  $P = 0.0122$ ), with no difference for RES females when compared to unstressed CTRL, confirming that vulnerability to chronic social stress is linked to sex-specific alterations in the female brain vasculature.

Next, we confirmed that this stress-induced sex- and region-specific change is also present at the protein level using double immunostaining with the endothelial cell marker cluster of differentiation 31 (CD31) (**Fig.1g**). Following 10-d CSDS, loss of *cldn5* in the female PFC was present only in SS and not RES mice when compared to unstressed CTRL (**Fig.1h**,  $P = 0.0005$ ) and significantly correlated with social interactions (**Fig.1h**, **Extended Fig.2d-g**). No difference was observed in the NAc of stressed females (**Extended Fig.2h-i**). Finally, we assessed the translational value of our mouse findings by evaluating *CLDN5* expression in post-mortem ventromedial PFC tissue from depressed women who died by suicide. We confirmed ~50% loss of *CLDN5* in MDD women when compared to matched nonpsychiatric controls ( $P = 0.0068$ ) along with alterations in vessel morphology (**Fig.1i**, **Supplementary Table 2** for qPCR primers and **Supplementary Table 3** for demographics). Conversely, no significant difference was observed for depressed men in this brain region (**Fig.1i**,  $P = 0.8099$ ). Together these findings suggest that chronic stress induces sex- and region-specific BBB alterations that may be involved in sexual dimorphism of MDD symptomatology.

**Sex- and region-specific vascular changes promoted by subchronic variable stress in line with anxiety- and depression-like behaviours.**

Female rodents are more vulnerable to unpredictable stress with 6 consecutive days of variable stressors being sufficient to induce anxiety- and depression-like behaviours in females but not males<sup>15</sup>, allowing for an exploration of the mechanisms underlying sex-specific stress responses. Female mice were exposed to a series of 3 different stressors namely foot shocks, tail suspension or restraint stress (1/day), repeated twice and then subjected to a battery of behavioural tests (**Fig.2a**). Exposure to this subchronic variable stress (SCVS) paradigm induced social avoidance (**Fig.2b, Extended Fig.3a**,  $P=0.0548$  for social interaction ratio and  $P=0.0323$  for time spent in the interaction zone when the aggressor is present), anxiety in the elevated plus maze (**Fig.2c, Extended Fig.3b**,  $P=0.026$  and  $P=0.0675$  for time spent in closed and open arms, respectively) and anhedonia in the sucrose preference test (**Fig.2d**,  $P=0.0004$ ,  $P=0.0007$  and  $P=0.0042$  for 24h, 48h and in average, respectively). Stress-induced alterations in these behavioral domains were correlated with each other particularly for anhedonia (**Extended Fig.3c**). Along with the establishment of anxiety- and depression-like behaviours, 6-d of SCVS instigates changes in the neurovasculature of the female brain. Transcriptomic studies of BBB associated genes revealed ~30% loss for *cldn5* in the NAc of stressed mice (**Fig.2e-f**,  $P=0.0421$ ) with greater downregulation in the PFC (~40%) when compared to unstressed controls (**Fig.2g-h**,  $P=0.0125$ ). No significant difference was observed for the endothelial cell marker CD31 (*pecam1*, **Fig.2e-h**) or other tight junctions (**Extended Fig.3f-g**). We again evaluated the translational value of our mouse findings in *postmortem* brain samples from MDD women and men and observed a loss of *CLDN5* at the mRNA level ( $P=0.0275$  and  $P=0.0253$ , respectively). However, morphology of the vessels appears to be intact in the female brain (**Fig.2i**), suggesting that this brain region could be less vulnerable than the ventromedial PFC.

## **Downregulation of tight junction claudin-5 expression in the prefrontal cortex promotes anxiety-like and depression-like behaviours, including social avoidance, in females.**

To confirm that loss of *cldn5* in the female PFC plays a causal role in the establishment of anxiety- and depression-like behaviours we used an adeno-associated virus (AAV)-mediated approach to conduct functional studies (**Fig.3a**). We chose this approach since *cldn5*-deficient mice die within 10h of birth<sup>22</sup> and stress paradigms were performed in adult mice. It also allows downregulation of *cldn5* expression in a brain region and cell-specific manner<sup>7</sup> with this tight junction only expressed in endothelial cells<sup>23</sup>. We first confirmed the efficiency of *cldn5* conditional knockdown at mRNA ( $P=0.0021$ ) and protein ( $P=0.0403$ ) level following injection of an AAV2/9 serotype expressing a doxycycline-inducible *cldn5*-targeting shRNA (AAV-shRNA-*cldn5*)<sup>24</sup> in this brain region (**Fig.3b**). Next, another cohort of female mice injected with either an AAV-shRNA-*cldn5* or an AAV-shRNA (control) virus<sup>24</sup> were subjected to a battery of behavioral tests<sup>7</sup> (**Fig.3a**). Half the mice were exposed to a micro-defeat prior to behavioural testing. This acute stress does not induce anxiety- or depression-like behaviours in naive mice but is commonly used to reveal a pro-susceptible phenotype<sup>7</sup>. Viral-mediated downregulation of *cldn5* expression in the female PFC decreased time spent in the open arms of the elevated plus maze (**Fig.3c**, **Extended Fig.4a-b**), time spent grooming in the splash test (**Fig.3d**), sucrose consumption (**Fig.3e**, **Extended Fig.4c**) and increased immobility time in the forced swim test (**Fig.3f**). On the other hand, social interactions were reduced in both virus-injected groups following a micro-defeat (**Fig.3g**). A significant virus effect was observed for most behavioral tests with no difference between unstressed vs stressed AAV-shRNA-*cldn5*-injected animals, indicating that artificial opening of the BBB in the PFC is sufficient to induce anxiety- and depression-like behaviours in female mice without prior acute stress exposure (**Fig.3h**,  $P=0.0129$  for elevated plus maze open

arms,  $P=0.0084$  for splash test,  $P<0.0001$  for sucrose preference,  $P=0.0453$  for forced swim test). As shown in **Fig.3i and Extended Fig.4d**, viral-mediated loss of *cldn5* in the female PFC affects multiple behavioural domains revealing a central role of the BBB in this brain region in mediating stress responses. Finally, we explored further the impact of *cldn5* downregulation in the PFC on social interactions by injecting a separate cohort of female mice with AAV-shRNA-*cldn5* or control AAVs and exposing them to CD1 mice of both sexes in a SI test (**Fig.3j**). Reduction of *cldn5* expression in the female PFC induced social avoidance when mice were given the opportunity to interact with another female ( $P=0.0123$ ) but not with a male ( $P=0.2548$ ) (**Fig.3k, Extended Fig.5a-b**). Social interactions were significantly correlated between sexes with mice injected with the AAV-shRNA-*cldn5* virus interacting less than the AAV-shRNA controls (**Fig.3l, Extended Fig.5c**). Importantly, loss of *cldn5* expression is significantly correlated with social avoidance observed towards female mice (**Fig.3l**). Overall, these results suggest that loss of BBB integrity in the female PFC could play a key role in the pathogenesis of maladaptive stress responses and mood disorders.

### **Sex-specific endothelium transcriptomic profiles are associated with resilience vs the establishment of depression-like behaviours following chronic stress exposure.**

To gain mechanistic insights on the effects of chronic social and variable stress on BBB biology and properties we performed transcriptome-wide gene expression profiling of female PFC endothelial cells. Female mice were subjected to 10-d CSDS, behavioral phenotype was defined using the SI test and PFC punches were collected 24h later and immediately processed through magnetic-activated cell sorting (MACS) which exploits immunomagnetic microbeads to quickly and gently separate cell types<sup>7,25-27</sup> (**Fig.4a, Extended Fig.6a-b**). Enrichment of endothelial cells



and genes specific to this cell population were confirmed by fluorescence-activated cell sorting and qPCR, respectively (**Extended Fig.6c**)<sup>7</sup>. RNA was extracted from female PFC endothelial cells of unstressed CTRL, SS and RES mice (**Fig.4b**,  $P<0.0001$ ) and transcriptome profiles established with the mouse Clariom S assay, which allows measurement of gene expression from >22,000 well-annotated genes<sup>7,25</sup>. Hierarchical clustering of endothelium gene expression variations revealed low overlap between SS and RES groups with fold changes often going in the opposite direction when compared to unstressed CTRL (**Fig.4c**). These findings confirm that chronic social stress induces BBB adaptations underlying individual differences in stress responses. Analysis of biological pathways differentially regulated between PFC endothelial cells of SS vs CTRL female mice revealed increased expression of genes associated with oxidative damage while omega-3/omega-6 fatty acid synthesis was linked with resilience (**Fig.4d**). Glial cell line-derived (Gdnf)-Ret signalling (**Fig.4d**,  $P=0.0141$ ) and genes linked to angiogenesis, cell migration and polarization (*cytl1*, *robo2*, *fat4*, *dock4*), BBB transport (*cav2*, *slc25a20*), permeability and inflammation (*lcn2*, *pla2g7*, *vegfa*, *ccl19*, *ccl21a*) were differentially regulated in the female SS PFC when compared to RES animals (**Fig.4e**). Gdnf, a neurotrophic factor, can alter *cldn5* expression<sup>28</sup> while a proinflammatory environment promotes BBB hyperpermeability through loss of structural integrity and tight junction disassembly<sup>7,29</sup>.

We next sought to determine if exposure to a different type of chronic stressor would lead to a common or divergent endothelium transcriptomic profile in animals characterized by a depressive phenotype. Female mice were subjected to the 6-d SCVS paradigm (**Fig.5a**) then PFC punches were collected 24h after the last stressor and endothelial cells were isolated using MACS. RNA was extracted and endothelium transcriptomic profiles produced using the mouse Clariom S assay as described above. As expected, stressed animals (SCVS) clustered together vs unstressed

CTRL (**Fig.5b**). However, when hierarchical clustering was performed on samples from mice exposed to either chronic social or variable stress, we noted similarities between the SS and SCVS groups, both characterized by depression-like behaviours, when compared to the RES animals (**Fig.5c**). Alignment of PFC gene expression changes normalized on RES female mice revealed an overlap in the SS/SCVS directionality and amplitude (**Fig.5c**), suggesting that different types of stressors can lead to similar BBB-related gene alterations underlying stress vulnerability in females. The endothelium transcriptomic changes induced by chronic stress are highly sex-specific with almost no overlap observed between males and females in vulnerable brain regions despite exposure to the same stressor (**Extended Fig.7a-c**). Moreover, by comparing *cldn5* expression at baseline we noted ~25% more in the PFC ( $P=0.0044$ ) and NAc ( $P=0.0034$ ) of unstressed females when compared to their male counterparts (**Extended Fig.7d**). Sex-specific expression of this tight junction protein is correlated between these two mood-related brain regions (**Extended Fig.7d**,  $P=0.0089$ ) possibly in line with the individual differences observed following chronic stress exposure. In the female PFC, transforming growth factor beta (TGF $\beta$ ) signalling was associated with SCVS (**Fig.5d**,  $P<0.0001$ ) along with a decreased expression of genes involved in the Wnt signalling pathway (*ctnmb1*, *axin2*) or maintenance of BBB integrity (*tjp1*, *yap1*) and increased expression of inflammatory mediators (*il18*, *ccl19*, *ccr5*, *hsp90b1*) (**Fig.5e**). We explored publicly available human MDD databases to confirm translational value of our mouse sequencing-related findings<sup>9</sup>. Similar to mice, endothelium gene expression is altered in a sex-specific manner in mood-associated brain regions of depressed women (*CAV2*, *CCR5*, *CTNNB1*, *IL18*, *TJP1*, *TJP2*) vs men (*CLDN12*, *HSP90B1*, *VEGFA*, *YAP1*) with poor overlap for both (*DOCK4*, *PLA2G7*). TGF $\beta$  and Wnt signalling are both directly associated with angiogenesis and maintenance of BBB

integrity through expression of tight junction proteins, including *cldn5*<sup>30,31</sup>, suggesting that exposure to chronic stress could lead to BBB hyperpermeability in the female PFC.

### **Chronic stress induces sex-specific BBB leakiness and changes in blood-based vascular biomarkers in the stress-susceptible mice and depressed patients.**

Considering that both 10-d CSDS and 6-d SCVS paradigm induced loss of *cldn5* expression, blood vessel morphology alterations and proinflammatory transcriptomic changes in the female PFC, BBB permeability in this brain region was evaluated using peripheral injection of a 10kDa fluorescent-tagged dextran. First, we confirmed that retro-orbital injection of a 10kDa lysine-fixable dextran conjugated with an AlexaFluor488 (AF488-dextran) can fill blood vessels of the PFC but cannot readily cross the BBB in the absence of neurovascular damage (**Extended Fig.8a**). As a positive control, another cohort of mice was administered intravenously mannitol after injection of the dye to transiently open the BBB before perfusion. As expected, mannitol treatment alters BBB integrity allowing passage of the 10kDa dextran into the PFC parenchyma (**Extended Fig.8b**). Next, female mice were subjected to 10 days of CSDS, susceptibility and resilience was established with a SI test ( $P=0.0273$ ), then 24 h later mice were injected retro-orbitally with the AF488-dextran 30 min prior perfusion to flush remaining circulating dye and brain fixation (**Fig.6a**). No dye infiltration was observed for the unstressed CTRL confirming intact BBB integrity in the PFC of female mice in the absence of stress exposure (**Fig.6b**). Conversely, we found leaky vessels in both stressed groups with greater permeability for SS animals (**Fig.6b, Extended Fig.8C**) in line with the finding of stress-induced loss of *cldn5* (**Fig.1e-h**). We previously reported that chronic social stress reduces BBB integrity in the NAc of SS, but not RES, male mice along with no alterations observed in the PFC for either groups<sup>7</sup>. Our findings

highlight the importance of considering sex differences when investigating the role of the neurovasculature in stress responses and mood disorders.

One of the few studies investigating basal sex differences in human BBB permeability in healthy volunteers reported a difference in cerebrospinal fluid/serum albumin ratio<sup>32</sup>. Furthermore, identification of MDD-related biomarkers is greatly needed to help guide clinical diagnosis. Thus, we explored the potential of various vascular biomarkers to determine stress susceptibility vs resilience in our mouse models of depression. Female mice underwent the 10-d CSDS or 6-d SCVS paradigm and blood was collected 3 days before the first exposure to a stressor and 24h after the last stress (**Fig.6c-d, Extended Fig.9a-c**). Social and variable stress were associated with significant changes in soluble adhesion molecule sE-selectin (CSDS:  $P=0.0267$ ), soluble plasminogen activator inhibitor-1 (sPAI-1, CSDS:  $P=0.0004$ , SCVS:  $P=0.0010$ ), pro-matrix metalloproteinase 9 (pro-MMP9, CSDS:  $P=0.0245$ ) and soluble thrombomodulin (sThrombo, CSDS:  $P=0.0360$ ) in females as measured with a Milliplex cardiovascular panel (**Fig.6c-d, Extended Fig.9d-i**). No significant difference was observed between SS and RES animals except for sE-selectin which was increased in the blood serum of SS female mice only after 10-d CSDS ( $P=0.0131$ ) and negatively correlated with SI ratio ( $P=0.0488$ ) (**Fig.6e-f**). This vascular biomarker was also elevated after 6-d SCVS without reaching significance (**Fig.6g**,  $P=0.1829$ ). Changes in circulating vascular biomarkers are sex-specific with a difference observed in males for soluble intercellular adhesion molecule-1 (sICAM-1,  $P=0.0139$ ) and pecam-1 (sPecam-1,  $P=0.0296$ ) but not for sE-selectin ( $P=0.7246$ ) (**Fig.6h, Extended Fig.10a-d**). In fact, most vascular-related soluble molecules measured were characterized by sex differences at baseline (sE-selectin,  $P<0.0001$ ) (**Fig.6i, Extended Fig.10e**). The translational value of sE-selectin as a sex-specific biomarker of mood disorder was confirmed on blood samples obtained from depressed patients

(**Fig.6j**, women:  $P=0.0494$ , men:  $P=0.9055$ ). Like in mice, sE-selectin is lower at baseline in women of the healthy control group when compared to their male counterparts (**Fig.6k**,  $P=0.0499$ ) supporting that vascular sex differences could underlie MDD sexual dimorphism.

## Discussion

Only a handful of studies have explored BBB sex differences, most indirectly and *in vitro*<sup>33</sup> but, to our knowledge, none did so in the context of chronic stress in mice or MDD. Overall, our findings indicate that chronic social and subchronic variable stressors alter BBB integrity in the mouse female brain through loss of the tight junction protein *cldn5* in the PFC and, to some extent, other mood-related brain regions such as the NAc. Importantly, these vascular alterations are also present in *postmortem* human brain samples from depressed women. In mice, viral-mediated downregulation of *cldn5* in the PFC is sufficient to promote anxiety- and depression-like behaviours including social avoidance, anhedonia, and helplessness supporting a causal role in the establishment of maladaptive stress responses and possibly, mood disorders. We did not observe stress-induced BBB dysfunction in the male PFC<sup>7</sup> indicating that chronic stress and depression affects the neurovasculature in a sex-specific manner. Different stress paradigms elicit specific anxiety- and depression-like behaviours according to sex, each recapitulating certain aspects of the symptoms and molecular features of MDD<sup>34</sup>. Only females are susceptible to 6-d SCVS on the short term, however, both sexes display depression-like behaviours after weeks of stress exposure<sup>9,15</sup> or if behavioural testing is performed 30 days after the 6-d SCVS paradigm<sup>35</sup>. Discrepancies in these behaviours could explain the sex-specific regional vascular effects observed and, possibly, sexual dimorphism in MDD. Magnetic resonance imaging (MRI) studies also support this idea, with unmedicated women with MDD showing decreased grey matter volume in limbic regions, including the left ventral PFC, while this reduction is observed in striatal regions

for MDD men<sup>36</sup>. Our study is also in line with recent clinical observations reporting region-specific BBB disruption in psychiatric disorders<sup>37,38</sup>, although sex differences were not addressed.

Our work not only highlights fundamental sex differences in stress-induced neurovascular responses but also provides mechanistic insights by identifying key pathways and genes involved. Bulk tissue sequencing studies shows a major rearrangement of transcriptional patterns in mood-related brain regions in MDD with low overlap between depressed men vs women (~10%)<sup>9,11</sup>. This marked sexual dimorphism is also observed in mouse models of depression<sup>9,15</sup>. Neuronal contribution is undeniable, notably via changes in neurotransmitter systems<sup>9</sup>. Nevertheless, a significant enrichment for endothelium-related genes is also present<sup>9</sup> but had never been explored. Bulk RNA sequencing revealed a similar enrichment for genes related to this cell population in schizophrenia<sup>39</sup>, reinforcing the involvement of the neurovasculature in psychiatric disorders. Although the resilience phenotype in female mice is not as clearly defined as it is for their male counterparts when analyzing behaviors<sup>19,21</sup>, our endothelium transcriptomic profiling revealed a distinct resilience-associated pattern when compared to animals displaying anxiety- or depression-like behaviours induced by either chronic social or subchronic variable stress. We found secreted enzyme phospholipase A2 Group VII (Pla2g7) as a gene significantly upregulated in SS vs RES mice, and Pla2g7 methylation is associated with increased risk of coronary heart disease specifically in women<sup>40</sup>. On the other hand, carnitine acyl carnine translocase (Slc25a20) is decreased in the PFC of SS females when compared to RES, which is consistent with previous studies reporting decreased acetyl-l-carnitine in MDD patients<sup>41</sup>.

A possible mechanism for this sex- and region-specific vulnerability of the BBB is the presence of estrogen receptors on the neurovasculature. Endothelial cells express low levels of functional estrogen receptors<sup>42</sup> and estrogen-coupled receptors can enter the cell nucleus and bind

to estrogen-responsive elements (ERE) on specific DNA sequences<sup>43</sup>. Interestingly, ERE and stimulating protein 1 (Sp1) transcription factors were identified on the mouse *cldn5* gene promoter, which allows estrogen receptors to modulate *cldn5* transcription through cooperative interactions of Er/Sp1 with ERE/Sp1 elements<sup>44</sup>. While high levels of estrogen render female rats more sensitive to stress-induced PFC dysfunction<sup>45</sup>, this was found to be protective in the striatum<sup>46</sup>, providing mechanisms to explore for future studies. Our group has recently shown that permissive epigenetic regulation of *cldn5* expression paired with low endothelium *cldn5*-repressive transcription factor forkhead box protein O1 is associated with stress resilience in the NAc of male mice, while increased histone deacetylase 1 level and activity is a mediator of stress susceptibility<sup>8</sup>. Thus, investigating sex-specific epigenetic vascular mechanisms underlying susceptibility vs resilience to stress and BBB hyperpermeability will be important in the future.

Additionally, estrogen-activated receptors have been shown to inhibit the proinflammatory transcription factor NfκB (nuclear factor kappa light chain enhancer of activated B cells), a known regulator of ICAM-1 and E-selectin<sup>47</sup>. Increased circulating proinflammatory cytokines and NfκB were reported in adolescent MDD and bipolar disorder, correlated with depressive symptoms severity<sup>48</sup>, and we have identified the proinflammatory NfκB pathway as a mediator of stress susceptibility in NAc endothelial cells of male<sup>8</sup> but not female mice (**Fig.4-5**). Accordingly, we observed a sex-specific increase in circulating sICAM-1 levels only in SS male mice vs pre-CSDS at baseline (**Extended Fig.10**) and *icam1* levels are increased in the NAc of SS male mice but reduced in the PFC of SS female mice (data not shown), reinforcing the idea of sex-specific regulatory mechanisms of BBB integrity, possibly through estrogen-mediated pathways. Social defeat stress increases expression of adhesion molecules in the mouse brain, including *icam-1* and *sele* the gene encoding for E-selectin<sup>49</sup>. Moreover, elevated blood sE-selectin level was reported

in elderly with mild cognitive impairment and depressive mood<sup>50</sup>, however, these studies did not address sex differences. Assessment of BBB leakage using MRI scans in patients suffering from bipolar disorder allowed identification of a sub-population of patients characterized by worse symptoms including severity of depression, anxiety, chronicity of illness and decreased global functioning<sup>51</sup>. Despite being commonly used worldwide, it would be unrealistic to apply BBB imaging to a large population scale or in a preventive context highlighting the importance in discovering biomarkers of psychiatric diseases as we aimed to do here. It could be particularly relevant for conditions involving exacerbated inflammation and/or vascular dysfunction and for which MDD prevalence is higher than the general population, for example stroke or Alzheimer's disease<sup>1</sup>.

Many unanswered questions persist regarding BBB adaptations in both health and disease<sup>18</sup>. Our multidisciplinary approach allowed us to identify sex-specific circulating vascular biomarkers as well as candidate genes and pathways that could be relevant to inform on MDD diagnosis and develop novel treatments. Targeting and regulating tight junction protein integrity at the BBB level could represent an innovative strategy to treat mood disorders<sup>37</sup>. However, thinking beyond endothelial cells will be important to better understand the complex biology underlying BBB hyperpermeability in MDD. Single-cell sequencing of post-mortem brain tissue from MDD patients shows important dysfunction in the PFC pyramidal neurons and oligodendrocyte-lineage cells<sup>52</sup> but to our knowledge this had never been investigated for endothelial cells, smooth muscle cells or pericytes. By characterizing sex- and region-specific neurovascular alterations underlying stress susceptibility in mice and human depression we provide valuable clues and highlight the need to consider sex as a biological variable while defining the role of brain barriers in psychiatric diseases. Although this project explored



neurovasculature-related changes in two brain regions, many other areas involved in emotion regulation remain unexplored and we hypothesize that stress-induced BBB changes go beyond the NAc and PFC. It will also be intriguing to investigate if age-related neurovascular changes such as BBB breakdown, which has been linked to human cognitive dysfunction<sup>53</sup>, play a causal role in late-life depression<sup>54</sup> which is more prevalent in women<sup>55</sup>.

## Sex-specific blood-brain barrier alterations and vascular biomarkers underlie chronic stress responses in mice and human depression.

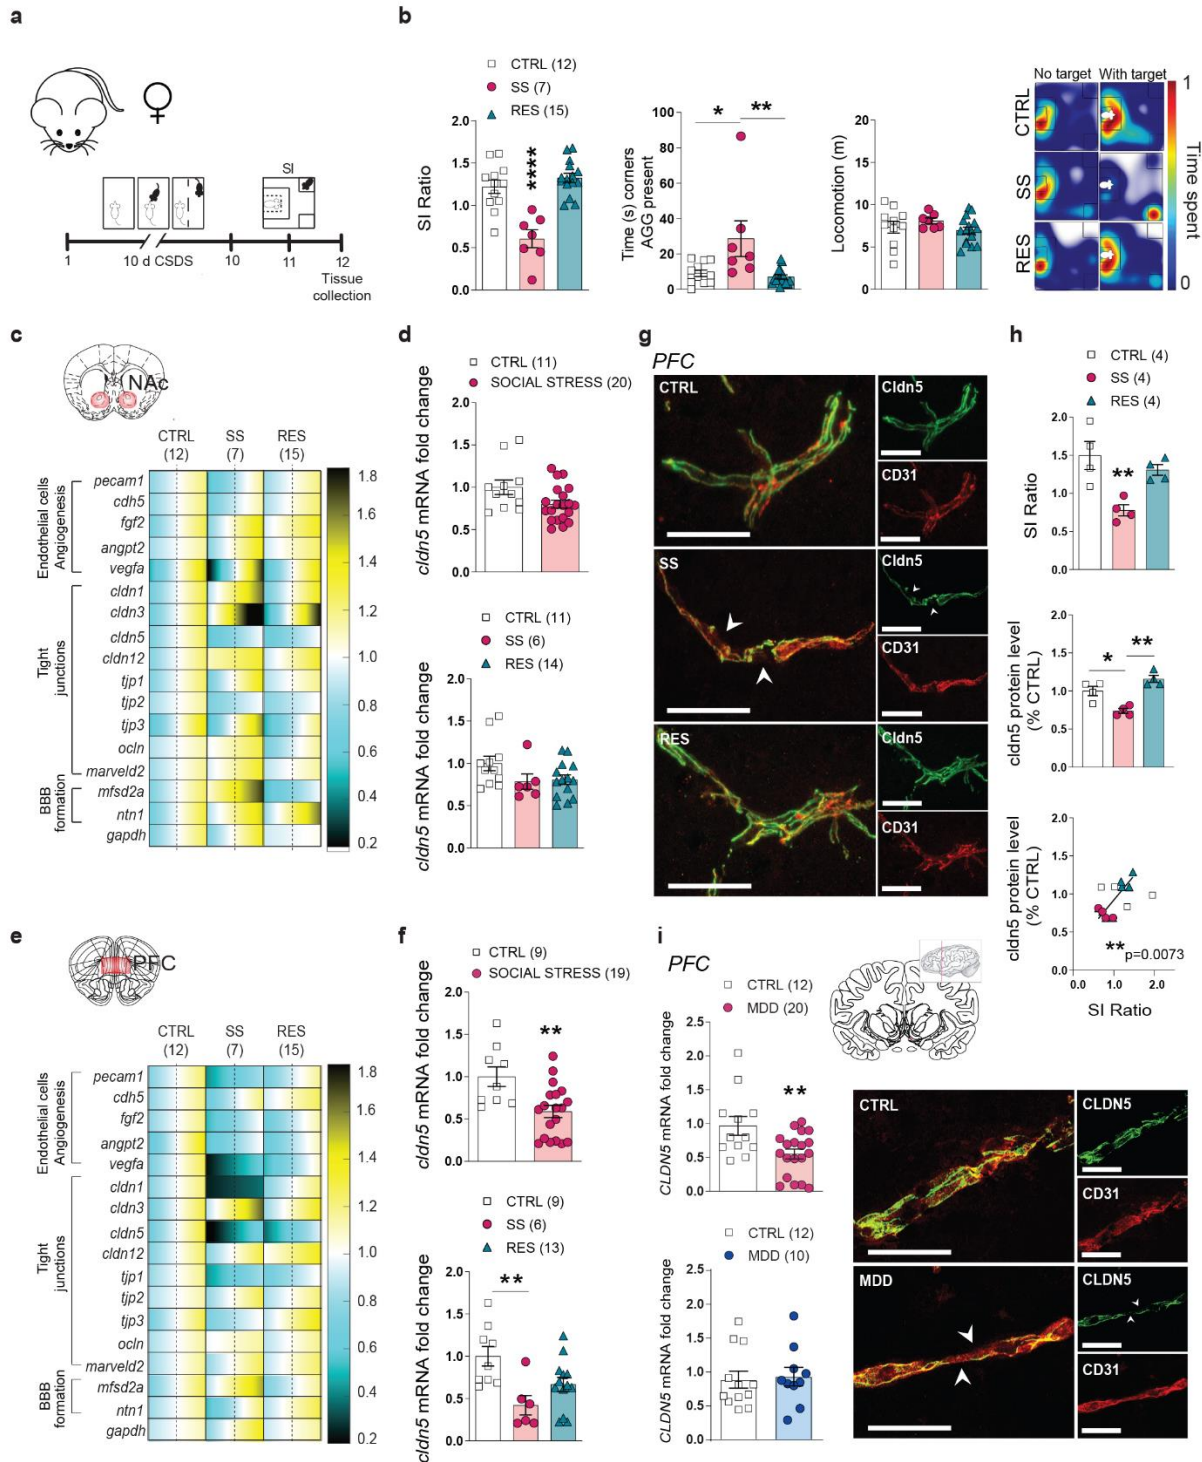

Dion-Albert et al. - Fig.1

**Figure 1. Chronic social stress induces region-dependant neurovascular changes in female**

**mice. a**, Experimental timeline of 10-d chronic social defeat stress (CSDS), social interaction (SI) and tissue collection of NAc and PFC. **b**, Individual SI values (left), time (s) in corners with aggressor (AGG) present (middle) and representative heatmaps of normalized time spent in the arena during SI test. **c**, Quantitative PCR revealed changes in the NAc of stress susceptible (SS) and resilient (RES) mice when compared to unstressed controls (CTRL) of gene expression related to endothelial cells, angiogenesis, tight junctions, and BBB formation, **(d)** but *cldn5* levels remained unchanged. The range of color indicates individual differences within a group; s.e.m. from the average represented by the dashed line. **e**, Quantitative PCR in the PFC revealed region-specific changes in SS and RES mice when compared to unstressed CTRL, and *cldn5* mRNA **(f)** and protein levels **(g,h)** were lower in the PFC of SS mice and correlated with social avoidance. Scale bars, 20  $\mu$ m. **i**, *CLDN5* mRNA fold change was significantly lower in the PFC of women MDD along with morphological vascular alterations. No significant difference was observed for men. Scale bars, 20  $\mu$ m. Data represent mean  $\pm$  s.e.m; number of animals or subjects (*n*) is indicated on graphs. Correlations were evaluated with Pearson's correlation coefficient; 2-group comparisons were evaluated with unpaired t-tests and one-way ANOVA followed by Bonferroni's multiple comparison test for other graphs. \* $p < 0.005$ ; \*\*  $p < 0.01$ ; \*\*\*\*  $p < 0.0001$ .

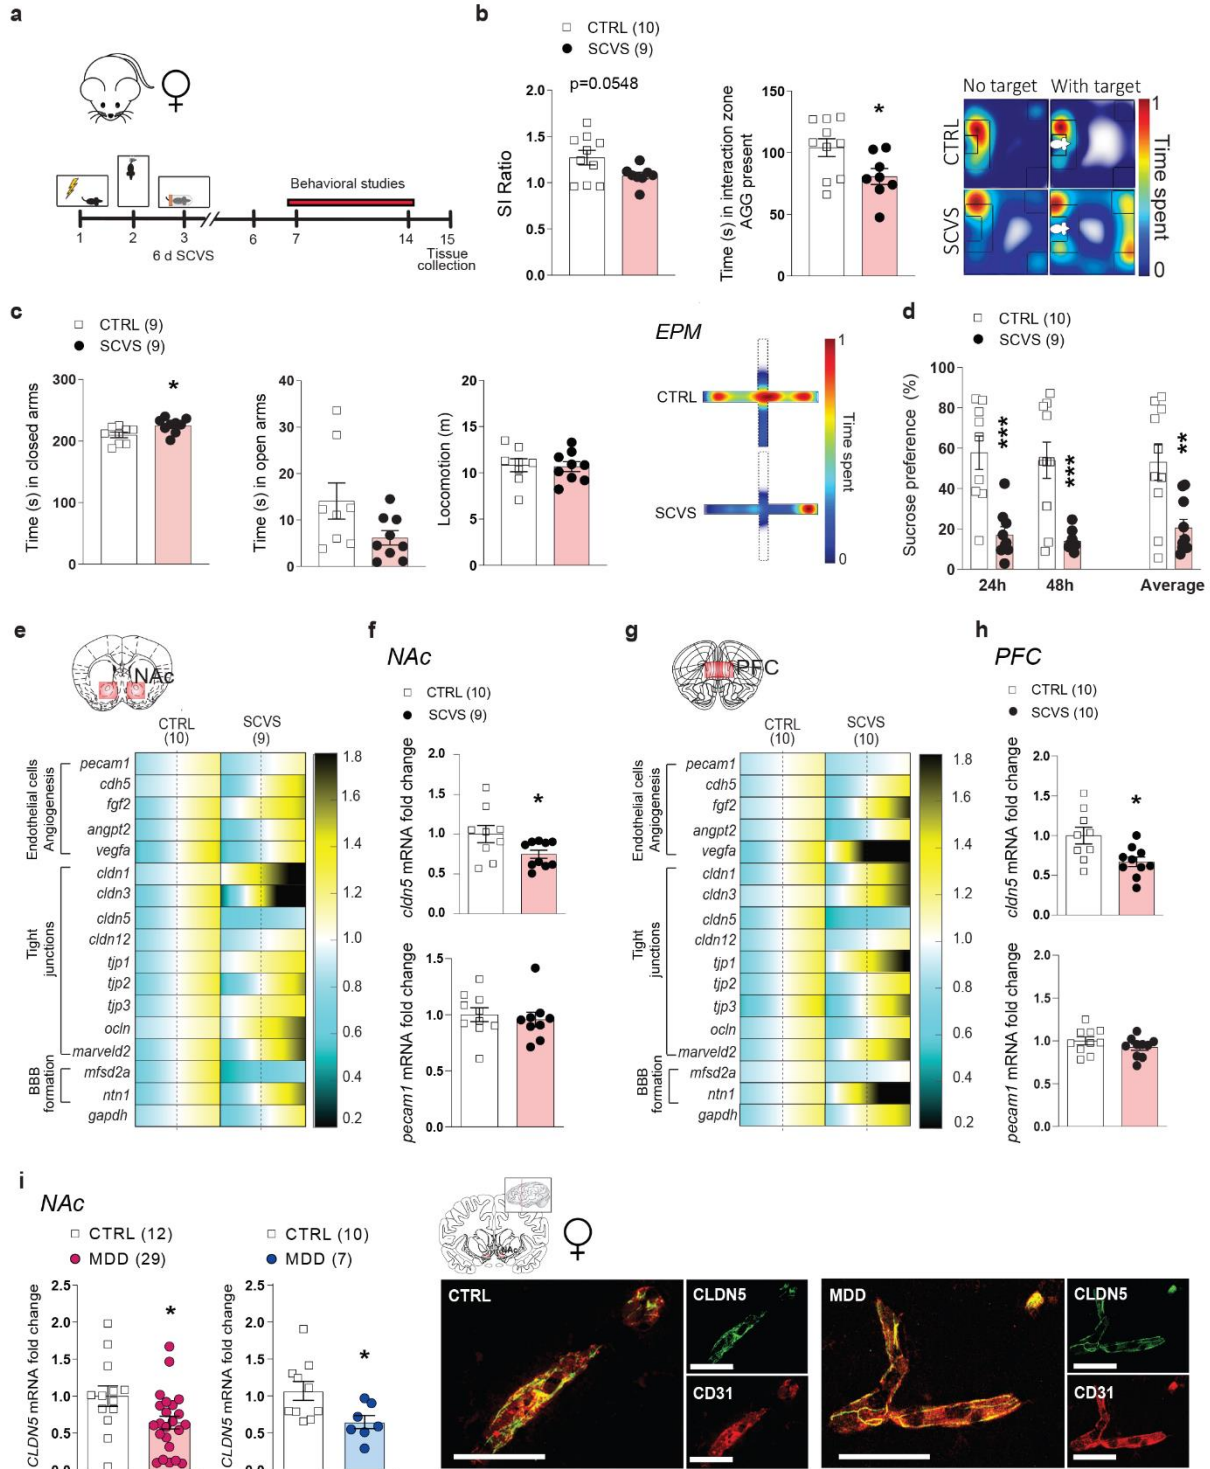

Dion-Albert et al. - Fig.2

**Figure 2. Six-day chronic variable stress induces behavioral and region-dependent neurovascular changes in female mice.** a, Experimental timeline of 6-d chronic variable stress

(CVS) and behavioral studies. **b**, CVS induces slight social interaction deficits and decreased time in the interaction zone in stressed female mice when the social target (aggressor, AGG) is present, in the social interaction test. **c,d**, 6-d of CVS is enough to induce significant anxiety- and depression-like behaviors in the elevated plus maze (**c**) and sucrose preference (**d**) tests. **e**, Quantitative PCR of genes related to endothelial cell biology, angiogenesis, tight junctions and BBB formation reveals significant changes in the NAc of stressed female mice (**f**), and downregulation of *cldn5* mRNA levels. **g**, Quantitative PCR of those genes in the PFC reveals region-specific neurovascular changes in stressed female mice vs controls (CTRL) (**h**) and significant downregulation of *cldn5* mRNA expression. **i**, *CLDN5* mRNA fold change was significantly lower in the NAc of female and male MDD patients, but double immunostaining revealed a good overlap of CLDN5 with CD31 in the female brain. Scale bars, 20  $\mu$ m. Data represent mean  $\pm$  s.e.m; number of animals or subjects (*n*) is indicated on graphs. 2-group comparisons were evaluated with unpaired t-tests. \* $p < 0.005$ ; \*\* $p < 0.01$ ; \*\*\* $p < 0.001$ .

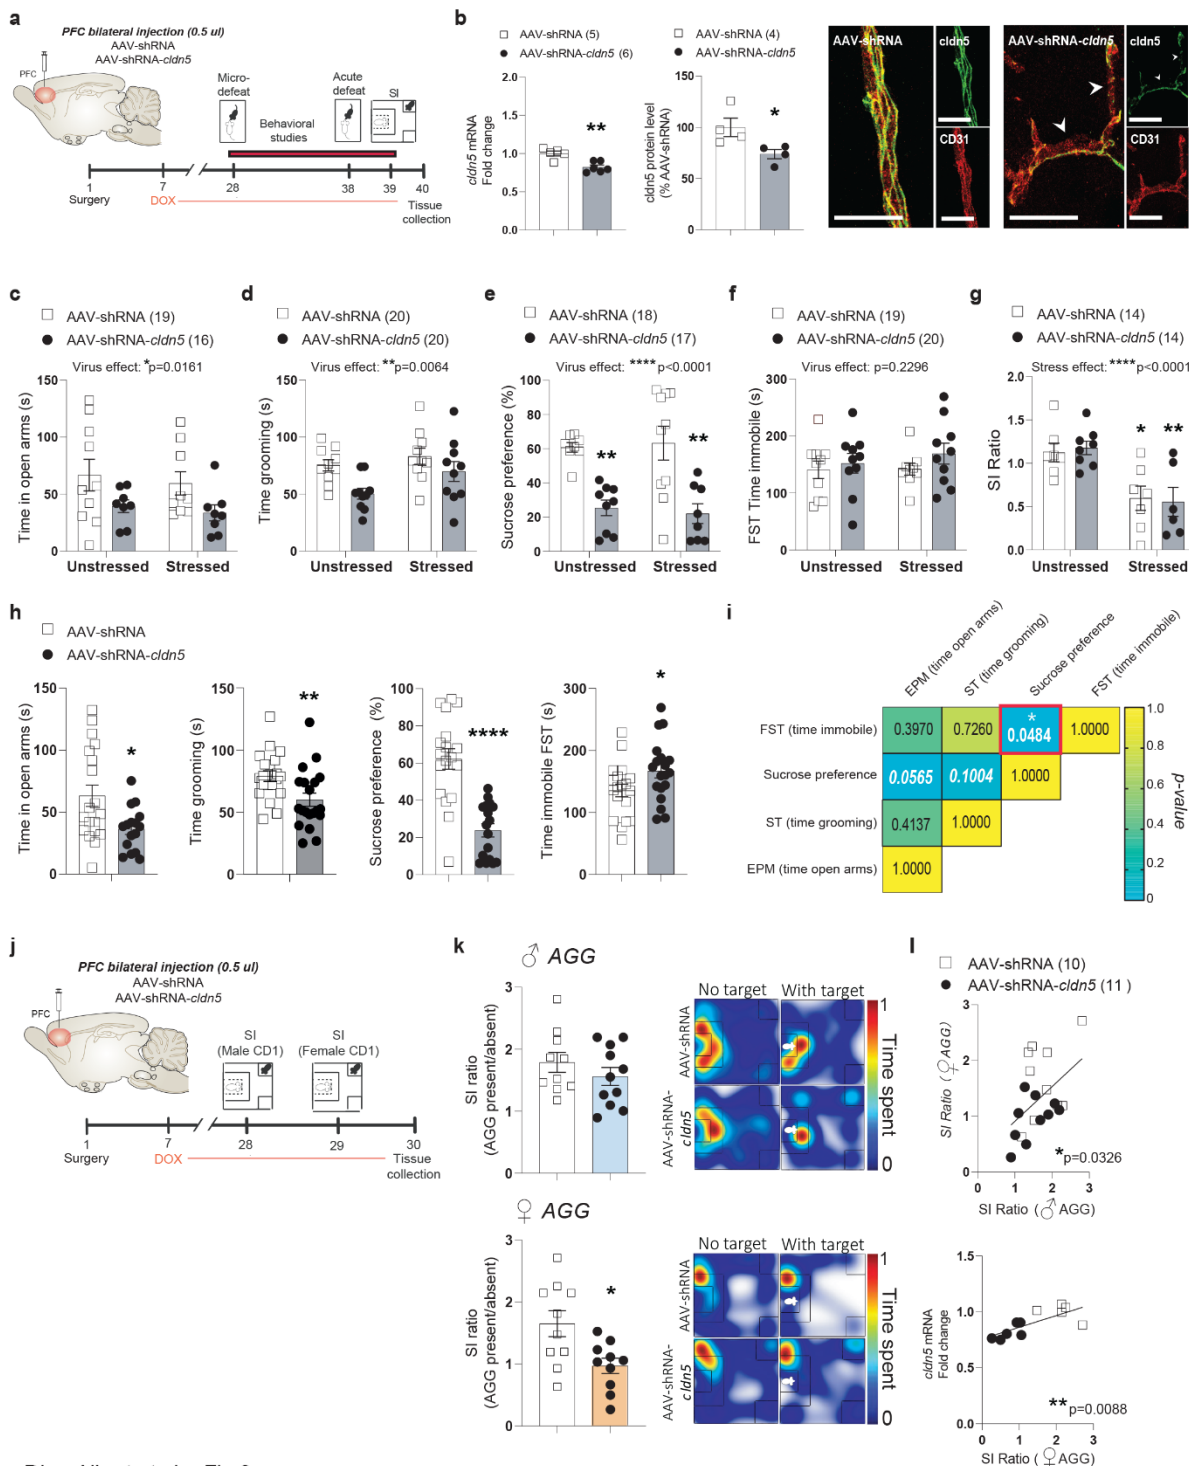

Dion-Albert et al. - Fig.3

**Figure 3. Conditional knockdown of *cldn5* expression in the PFC is sufficient to induce anxiety- and depressive-like behaviors.** **a**, Experimental timeline of PFC bilateral injection of AAV-shRNA of AAV-shRNA-*cldn5* viruses and behavioral studies. **b**, *cldn5* mRNA and protein



levels are reduced following AAV-shRNA-*cldn5* injection in the PFC of female mice compared to that in AAV-shRNA-injected mice, following doxycycline (Dox) treatment. Scale bars, 20 $\mu$ m. **c-g**, Subthreshold microdefeat (stressed mice) did not have a significant effect on anxiety- and depressive-like behaviors in the elevated plus maze (**c**), splash (**d**), sucrose preference at 48h (**e**), forced swim (**f**) and social interaction (**g**) tests. **h**, However, main virus effects are observed when comparing all AAV-shRNA vs AAV-shRNA-*cldn5* animals. **i**, Intraindividual correlation of different behavioral datapoints reveals trends between anxiety- and depressive-like behaviors. P values in the boxes refer to the strength of the correlation between behaviors. **j**, Experimental timeline of PFC bilateral injection of AAV-shRNA of AAV-shRNA-*cldn5* viruses and social interaction (SI) tests. **k**, No significant difference in SI Ratio was observed when a male social target (aggressor, AGG) was present, but was significant difference was found when a female AGG was present. **l**, SI ratios with a male and female AGG values are significantly correlated to each other, and with *cldn5* mRNA levels. Data represent mean  $\pm$  s.e.m; number of animals or subjects (*n*) is indicated on graphs. Two-way ANOVA followed by Bonferroni's multiple comparison test for behaviors, Correlations were evaluated with Pearson's correlation coefficient; 2-group comparisons were evaluated with unpaired t-tests. \* $p < 0.005$ ; \*\* $p < 0.01$ ; \*\*\*\* $p < 0.0001$ .

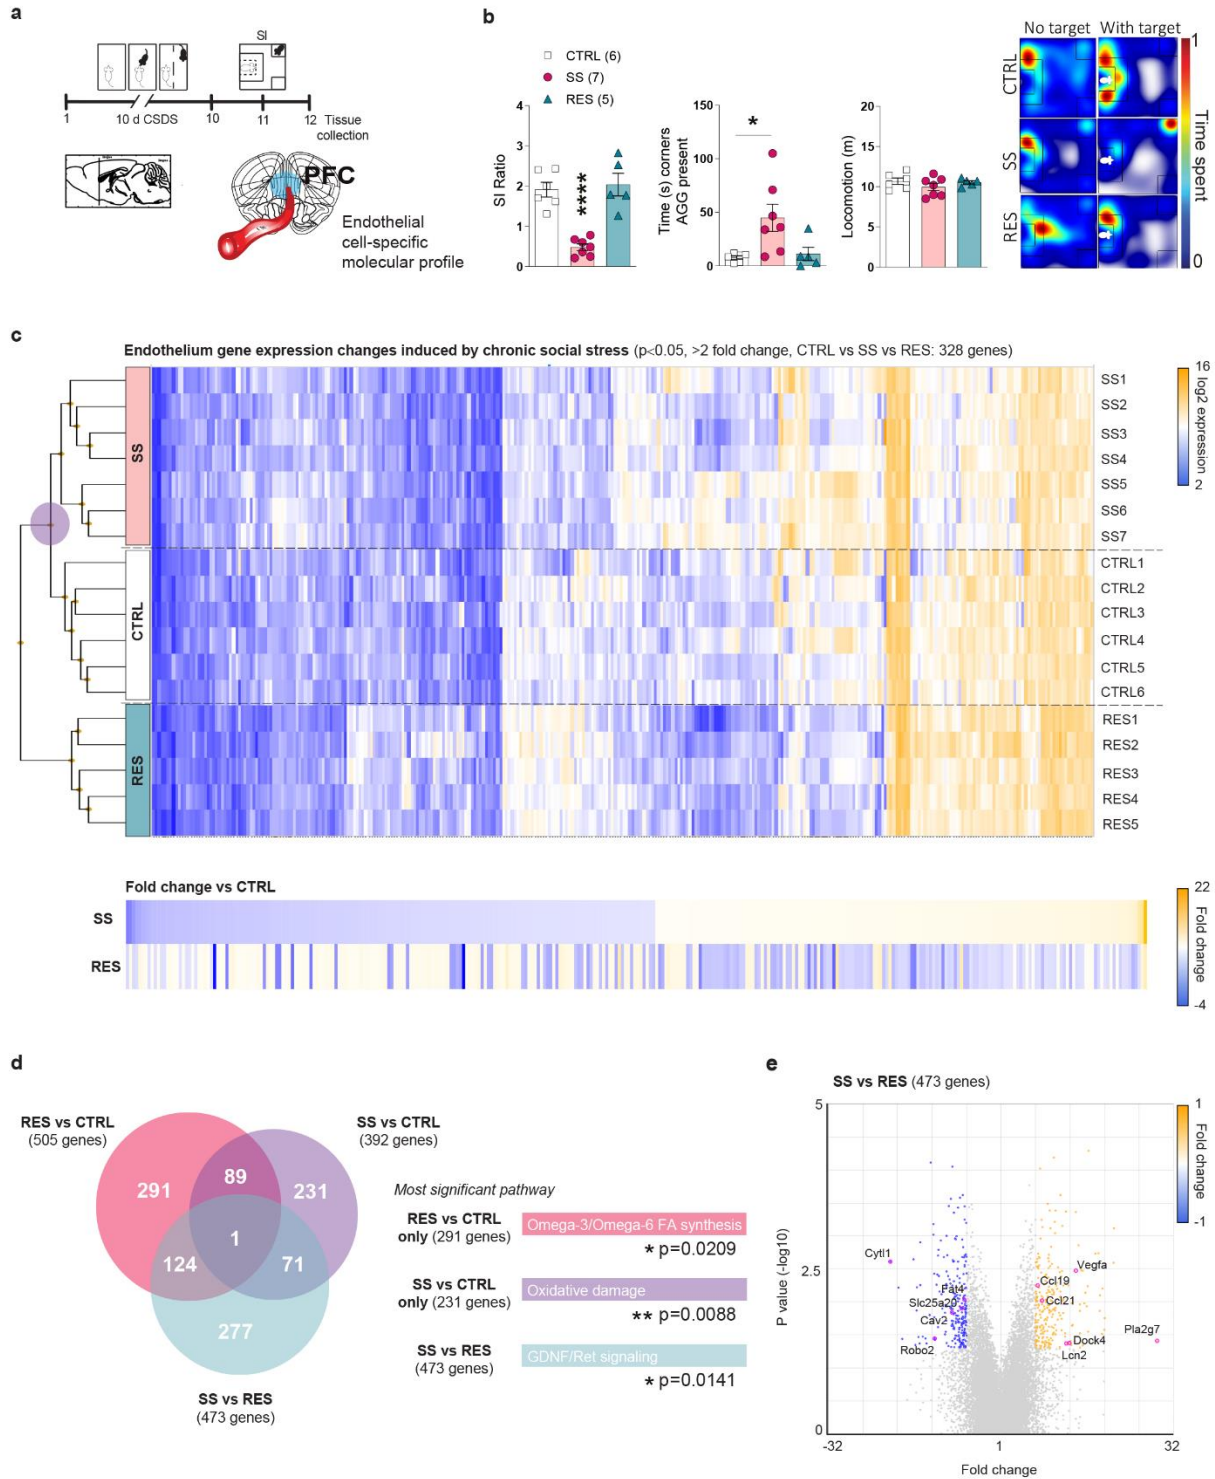

Dion-Albert et al. - Fig.4

**Figure 4. Susceptibility vs resilience to chronic social stress is associated with specific endothelium transcriptome-wide changes in the female PFC.** a, Experimental timeline of 10-d



chronic social defeat stress (CSDS) and **(b)** phenotype in the social interaction (SI) test of the mice used to establish PFC endothelial gene profiles. **c**, Hierarchical clustering heatmap of unstressed controls (CTRL), stress-susceptible (SS) and resilient (RES) mice, reveals that the RES group is the most distinct (purple circle, significance was set at  $\pm 2$ -fold change and  $p < 0.05$ ). In fact, normalization of gene expression changes on the CTRL group shows that in stressed mice a majority of genes are regulated in the opposite direction according to the phenotype. **d**, Venn diagrams indicates poor overlap of gene expression changes when group comparisons were performed with the largest number of genes associated to RES vs CTRL animals. Most significant biological pathways for each group comparison are displayed on the right according to the group comparison color. **e**, SS vs RES volcano plot highlights some of the most up- and down-regulated genes. Data represent mean  $\pm$  s.e.m; number of animals or subjects ( $n$ ) is indicated on graphs. One-way ANOVA followed by Bonferroni's multiple comparison test for behaviors. \* $p < 0.05$ ; \*\* $p < 0.01$ ; \*\*\*\* $p < 0.0001$ .

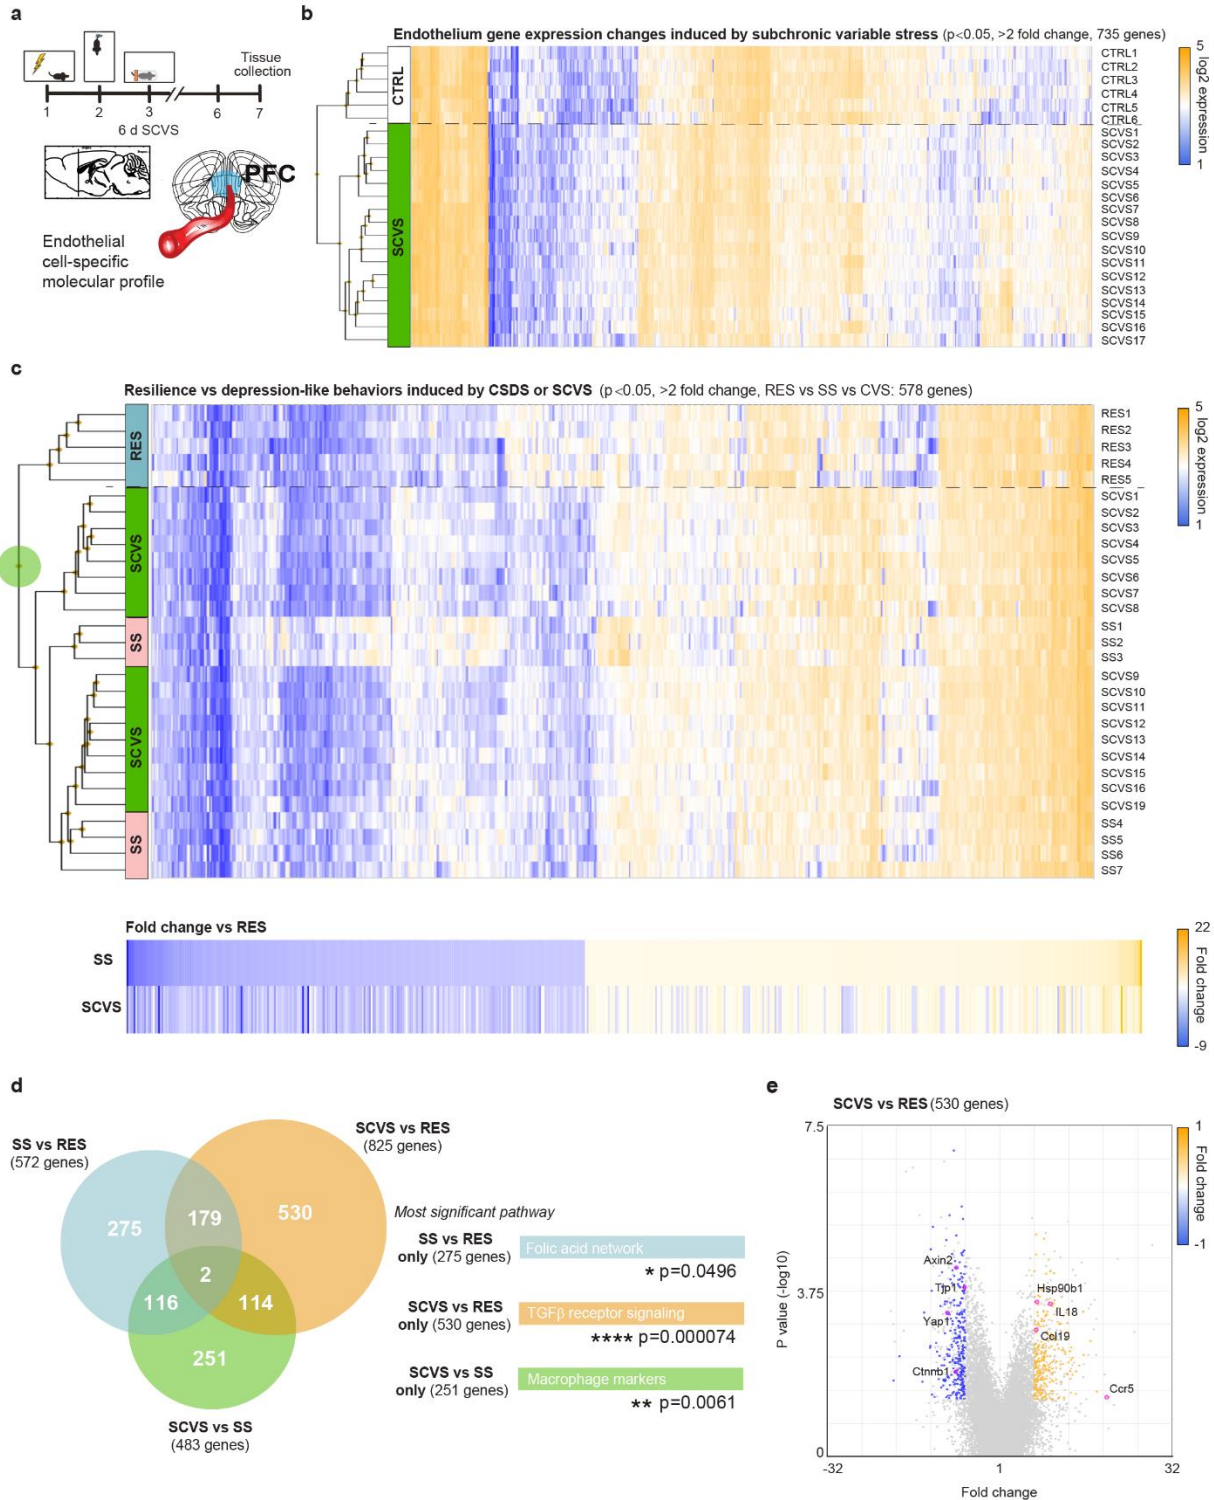

Dion-Albert et al. - Fig.5

**Figure 5. Subchronic variable stress induces transcriptome-wide changes in the female PFC endothelium.** **a**, Experimental timeline of the 6-d subchronic variable stress (CVS) and tissue

collection for endothelial cell-specific molecular profiling. **b**, Hierarchical clustering heatmap of unstressed controls (CTRL) vs mice subjected to CVS indicates distinct transcriptomic gene expression (significance was set at  $\pm 2$ -fold change and  $p < 0.05$ ). **c**, Hierarchical clustering heatmap of all stressed mice so animals exposed to either 10-d CSDS or 6-d CVS highlights a level of commonality in gene expression changes between females characterized by depression-like behaviors namely the stress-susceptible (SS) and CVS group when compared to resilient (RES) subjects (green circle). SS and CVS females cluster together and normalization of gene expression on RES animals reveals an overlap in the directionality of endothelium transcriptome changes. **d**, Venn diagrams show poor overlap of gene expression changes when group comparisons were performed, particularly for the CVS vs RES subjects. Most significant biological pathways for each group comparison are indicated on the right. **e**, CVS vs RES volcano plot highlights some of the most up- and down-regulated genes. Data represent mean  $\pm$  s.e.m; number of animals or subjects ( $n$ ) is indicated on graphs. One-way ANOVA followed by Bonferroni's multiple comparison test for behaviors. \* $p < 0.05$ ; \*\* $p < 0.01$ ; \*\*\* $p < 0.0001$ .

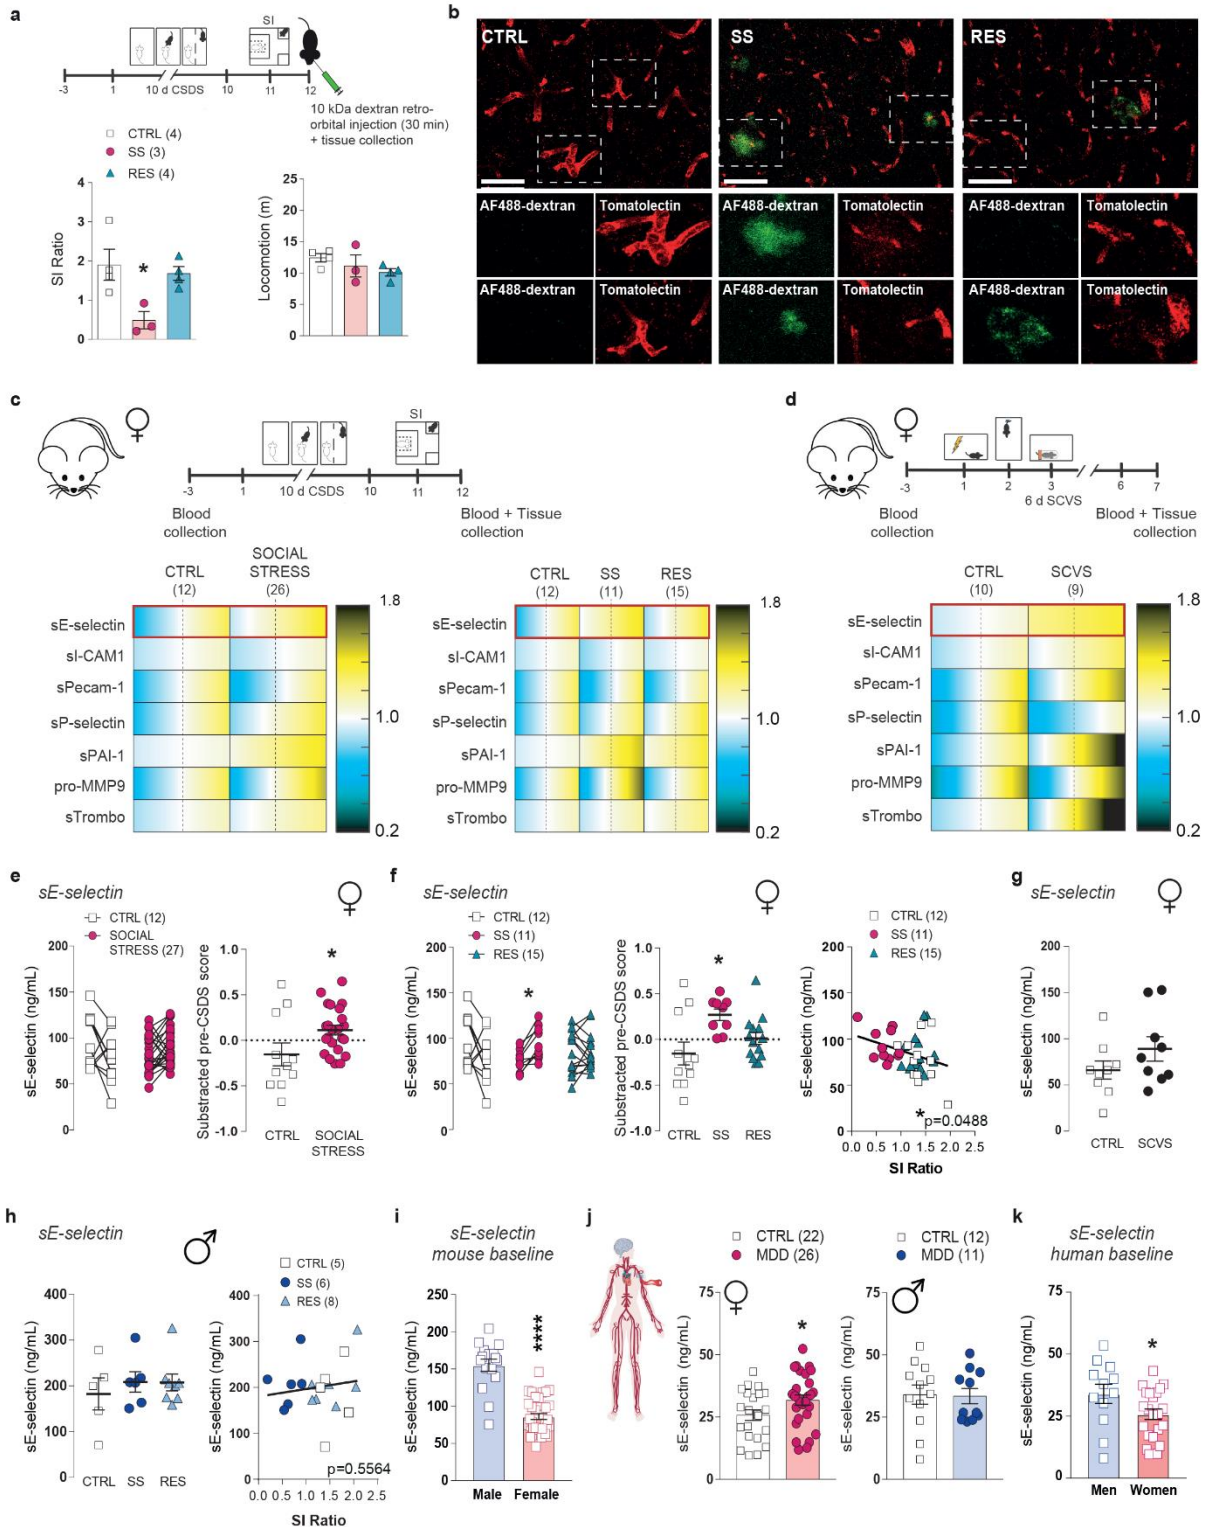

Dion-Albert et al. - Fig.6

**Figure 6. Chronic stress induces sex-specific BBB leakiness and release of vascular biomarkers in the blood of mouse and depressed human patients. a, Experimental timeline of**

10-d chronic social defeat stress (CSDS), social interaction (SI) and retro-orbital injection of fluorescent-labelled dextran (10,000 MW). Individual SI values and total locomotion (m) during SI test. **b**, Assessment of BBB permeability with Dextran Alexa Fluor-488 dye revealed significant BBB leakiness in the PFC of SS mice. Scale bars, 20 $\mu$ m. **c,d**, Experimental timeline of 10-d chronic social defeat stress (CSDS) and subchronic variable stress (SCVS) paradigms and blood collection for multiplex assays. **e,f**, Cardiovascular multiplex assays reveals significant upregulation of circulating soluble E-selectin (sE-selectin) when compared to baseline (pre-CSDS) serum levels in SS, but not RES mice, and post-CSDS levels correlated with social avoidance (**f**). **g-h**, Circulating sE-selectin levels were increased in female mice following 6-d SCVS without reaching significance, and remained unchanged in male mice following 10-d CSDS, and no correlation was found with SI ratio. **i**, Baseline serum levels of sE-selectin was ~40% lower in female vs male mice. **j-k**, Circulating sE-selectin levels were significantly upregulated in MDD women but not men, and levels in healthy controls were ~25% lower in women when compared to men (**k**). Data represent mean  $\pm$  s.e.m; number of animals or subjects (*n*) is indicated on graphs. Correlations were evaluated with Pearson's correlation coefficient; 2-group comparisons were evaluated with unpaired t-tests and one-way ANOVA followed by Bonferroni's multiple comparison test for other graphs. \* $p < 0.005$ ; \*\*\*\* $p < 0.0001$ .

## Methods

**Mice.** Female C57BL/6 J (~20 g) mice were purchased at 7 weeks of age from Charles River and allowed 1 week of acclimation at the housing facility of CERVO Brain Research Center. Sexually experienced retired male CD-1 breeders (~40 g) of at least 4 months of age (Charles River) were used as aggressors (AGG). All mice were singly housed following chronic social defeat stress or group-housed during subchronic variable stress and maintained on a 12-h/12-h light/dark cycle throughout. Mice were provided with *ad libitum* access to water and food. All mouse procedures were performed in accordance with the Canadian Council on Animal Care as well as animal care and use committee of Université Laval.

**Estrous cycle identification.** Estrous cycle stage was determined as previously described<sup>56</sup>. Briefly, vaginal lavage was performed with 20 $\mu$ L of saline and smeared on a slide. Cycle stage was determined by visual inspection of cells under bright-field microscope (Carl Zeiss).

**Urine collection.** CD-1 mice were placed in metabolic cages (Life Science Equipment) during the dark phase of the light/dark cycle. Urine was collected the following morning, filtered, aliquoted in 0.5 mL tubes and stored at -80°C until use.

**Chronic social defeat stress (CSDS).** CSDS using urine was performed as previously described by Harris et al.<sup>19</sup>. CD-1 mice were screened for aggressive behavior during inter-male social interactions for 3 consecutive days based on previously described criteria<sup>14</sup> and housed in the social defeat cage (26.7 cm width  $\times$  48.3 cm depth  $\times$  15.2 cm height, Allentown Inc) 24 h before the start of defeats (day 0) on one side of a clear perforated Plexiglas divider (0.6 cm  $\times$  45.7 cm  $\times$  15.2 cm,



Nationwide Plastics). Each female mouse was paired with the urine of a particular CD-1 mouse throughout the entire course of CSDS<sup>19</sup>. Each day, urine was applied to the base of the tail (20 uL), vaginal orifice (20 uL) and upper back (20 uL) of the female mouse then it was immediately subjected to physical interactions with an unfamiliar CD-1 AGG for 10 mins. After antagonistic interactions, experimental mice were removed and housed on the opposite side of the social defeat cage divider, allowing sensory contact, over the subsequent 24-h period. Throughout the sessions, mice were monitored for aggressive interactions and mounting behaviors. A session was immediately stopped if persistent mounting occurred. Unstressed control mice were housed two per cage on either side of a perforated divider and rotated daily in a similar manner without being exposed to the CD-1 AGG mice. Experimental and control mice were singly housed after the last bout of physical interaction and the social interaction (SI) test was conducted 24 h later.

As for the 2<sup>nd</sup> CSDS developed by Takahashi et al.<sup>21</sup> female defeat was performed as previously described. Briefly, a Cre-dependent DIO-Gq-DREADD-expressing AAV was bilaterally injected into the ventromedial hypothalamus of male estrogen receptor alpha (ER $\alpha$ )-Cre-dependent mice. After a recovery period of two weeks, mice were injected intra peritoneally (i.p.) with clozapine N-oxide (CNO). After 30 min, the female mouse was introduced into the home cage of the aggressor for 5 min. During the 10 days of defeat, female mice were housed in littermate pairs. Twenty-four hours after defeat, female mice were subjected to a SI test as described below, with a non-injected novel ER $\alpha$ -Cre mouse as the target. All mouse procedures for this model were performed in accordance with the National Institutes of Health Guide for Care and Use of Laboratory Animals and the Icahn School of Medicine at Mount Sinai Animal Care and Use Committee.

**Microdefeat stress & Acute defeat stress.** A subthreshold variation of the CSDS protocol was used to evaluate increased susceptibility to stress<sup>7,57</sup>. Urine from an unfamiliar CD-1 was applied to experimental C57Bl/6 J mice before being exposed to physical interactions with a new CD-1 AGG for three consecutive bouts of 10 mins, with a 15-min rest period between each bout. The SI test was conducted 24 h later. For acute defeat stress, only 1 bout of aggression was performed.

**Social interaction/avoidance test (SI).** SI testing was performed as previously described under red-light conditions<sup>7,8,14</sup>. First, mice were placed in a Plexiglas open-field arena (42 cm × 42 cm × 42 cm, Nationwide Plastics) with a small wire animal cage placed at one end. Movements were monitored and recorded automatically for 2.5 min with a tracking system (AnyMaze™ 6.1, Stoelting Co) to determine baseline exploratory behavior and locomotion in the absence of a social target (AGG). At the end of 2.5 min, the mouse was removed, and the arena cleaned. Next, exploratory behavior in the presence of a novel social target inside the small wire animal cage was measured for 2.5 min and time spent in the interaction and corner zones and overall locomotion were compared. SI ratio was calculated by dividing the time spent in the interaction zone when the AGG was present vs absent. All mice with a SI ratio below 1.0 were classified as stress-susceptible (SS) and all mice with a SI ratio above 1.0 were classified as resilient (RES).

**Subchronic variable stress (SCVS).** SCVS was performed as previously described<sup>15,58</sup>, which consisted of three different stressors over 6-days, alternated to prevent habituation. Stressors were administered in the following order: 100 random mild foot shocks at 0.45mA for 1h (10 mice to a



chamber; days 1 and 4), a tail suspension stress for 1h (days 2 and 5) and restraint stress, where the animals are placed inside a perforated 50 ml falcon tube, for 1h within the home cage (days 3 and 6). Tissues were collected 24h after the last stressor.

**Splash test.** The splash test was used to compare grooming behavior and performed under red-light conditions as previously described<sup>7,15</sup>. A 10% sucrose solution was sprayed 3-times on the lower back of the mice and time spent grooming over 5 minutes was videotaped and then recorded with a stopwatch by a blinded observer.

**Sucrose preference test.** Anhedonic responses were evaluated with a standard sucrose preference task. Water bottles from home cages were removed and replaced with two 50-mL conical tubes with sipper tops filled with water for a 24h habituation period. Next, water from one of the 50-mL conical tubes was replaced with a 1% sucrose solution. All tubes were weighed, and mice were allowed to drink *ad libitum* for a 24h period. Tubes were then reweighed and switched for another 24h period of *ad libitum* drinking to prevent place preference. At the end of the 48h testing period, sucrose preference was calculated by dividing the total amount of sucrose consumed by the total amount of fluid consumed over the 2 d of sucrose availability. For sucrose preference in sham and virus-injected mice, each bottle contained doxycycline treatment (2 mg/mL).

**Forced swim test (FST).** Forced swim test was used to evaluate helplessness as previously described<sup>7,15</sup>. Mice were placed into a 4-L glass beaker filled with 3 L of water at 25 °C under bright light conditions and videotaped for 6 min. Time spent immobile was measured with a stopwatch by a blinded observer. Immobility was defined as no movement at all or only minor

movements necessary to keep the nose above the water versus mobility, which was defined by swimming and struggling behaviors.

**Elevated plus maze.** Mice were placed in a black Plexiglas cross-shaped elevated plus maze (arms of 12 cm width  $\times$  50 cm length) under white light conditions for 5 min. The maze consists of a center area, two open arms without walls and two closed arms with 40-cm high walls set on a pedestal 1 m above floor level. Locomotion was monitored and tracked using an automated system (AnyMaze™ 6.1 Stoelting Co). Cumulative time spent in open arms, center, and closed arms as well as total locomotion was compared between groups.

**Transcriptional profiling of mouse tissue.** Nucleus accumbens (NAc) or prefrontal cortex (PFC) samples were collected and processed as described previously<sup>7,57</sup>. Bilateral 2.0mm punches were collected from 1-mm coronal slices on wet ice after rapid decapitation and immediately placed on dry ice and stored at  $-80^{\circ}\text{C}$  until use. RNA was isolated using TRIzol (Invitrogen) homogenization and chloroform layer separation. The clear RNA layer was processed using Pure Link RNA mini kit (Life Technologies) and analyzed with NanoDrop (Thermo Fisher Scientific). RNA was reverse transcribed to cDNA with Maxima-H-minus cDNA synthesis kit (Fisher Scientific) and diluted to 500  $\mu\text{L}$ . For each qPCR reaction, 3 $\mu\text{L}$  of sample cDNA, 5 $\mu\text{L}$  of Power up SYBR green (Fisher scientific), 1  $\mu\text{L}$  PrimeTime® qPCR primer (Integrated DNA Technologies) and 1  $\mu\text{L}$  ddH<sub>2</sub>O was added to each well. Samples were heated to  $95^{\circ}\text{C}$  for 2 mins, followed by 40 cycles of  $95^{\circ}\text{C}$  for 15s,  $60^{\circ}\text{C}$  for 33s and  $72^{\circ}\text{C}$  for 33s. Analysis was done using the  $\Delta\Delta\text{C}_t$  method and samples were normalized to the *gapdh* mouse housekeeping gene. Primer pairs (Integrated DNA Technologies) are listed in Supplementary Table 1.

**Transcriptional profiling of human tissue.** RNA was isolated using QIAzol Lysis Reagent (Qiagen) homogenization and chloroform layer separation. The clear RNA layer was processed using RNeasy Lipid Tissue Mini Kit (Qiagen) and analyzed with NanoDrop (Biotek). RNA was reverse transcribed to cDNA with iScript Reverse Transcription Supermix kit (Bio-Rad) and diluted to 500  $\mu$ L. For each qPCR reaction, 3  $\mu$ L of sample cDNA, 5  $\mu$ L of Power up SYBR green (Fisher scientific), 1  $\mu$ L PrimeTime® qPCR primer (Integrated DNA Technologies) and 1  $\mu$ L ddH<sub>2</sub>O was added to each well. Samples were heated to 95°C for 2 mins, followed by 40 cycles of 95°C for 15s, 60°C for 33s and 72°C for 33s. Analysis was done using the  $\Delta\Delta C_t$  method and samples were normalized to the *GAPDH* human housekeeping gene. Primer pairs (Integrated DNA Technologies) are listed in Supplementary Table 2.

**Immunohistochemistry (IHC) and quantification of cldn5.** Whole brains of mice were frozen using isopentane on dry ice after rapid decapitation. Brains were stored in aluminum foil at -80°C until use. Brains were embedded in OCT Compound (Thermo Fisher Scientific) and sliced on the cryostat at 20 $\mu$ m thickness. Slices were post-fixed for 10 min in ice-cold methanol before a quick wash in 0.1 M phosphate-buffered saline (PBS). Sections were then incubated for 2 h in blocking solution, consisting of 4% normal donkey serum (NDS), 1% Bovine Serum Albumin (BSA, GE Life Sciences) and 0.03% Triton X-100 in 0.1 M PBS before overnight incubation with primary antibodies (rabbit anti-cldn5, 1:250, Life Technologies, #34-1600) in blocking solution. Double immunostaining with CD31 (anti-rat-CD31, 1:100, Invitrogen, #14-0311-85) was performed to allow localization of blood vessels for quantification of tight junction protein levels. After three washes in PBS for 5 min, sections were incubated with anti-rabbit-Cy2 and anti-rat-Cy3 secondary

antibodies for 2 h (1:400, Jackson ImmunoResearch, #711-225-152, #712-165-153, respectively), washed again three times with PBS. Slices were mounted and coverslipped with ProLong Diamond Antifade Mountant (Invitrogen). One-micrometer-thick  $z$ -stack images of the NAc or PFC were acquired on an LSM-880 confocal microscope (Carl Zeiss). Images were taken using a 63 $\times$  lens with a resolution of 1628  $\times$  1628 and a zoom of 1.0. Pixel size was 0.98  $\mu\text{m}$  in the  $x$ - $y$ - $z$  planes, pixel dwell time was 1.98  $\mu\text{s}$  and the line average was set at 2. Maximum Intensity Projection was compared using Image J (NIH) with the region of interest (ROI) defined using CD31 staining.

**Immunohistochemistry (IHC) of Alexa Fluor 488 for BBB leakiness.** Twenty-four hours after the SI test, mice were anesthetized with a mixture of ketamine (100 mg/kg of body weight) and xylazine (10 mg/kg of body weight) and administered 0.1 mL of 1mg/mL solution of fixable Alexa Fluor 488-dextran (D22910, mW = 10kDa, ThermoFisher Scientific) through retro-orbital injection. After 30 mins, mice were perfused with ice-cold 0.1M PBS followed by 4% paraformaldehyde (PFA). Brains were post-fixed overnight in 4% PFA at 4 $^{\circ}\text{C}$  in the dark, then sliced on a vibratome (Leica) at 40  $\mu\text{m}$  thickness. Free-floating sections were washed in 0.1 M PBS and incubated for 2 h in blocking solution (5% NDS in 0.1 M PBS). Sections were then incubated in Lycopersicon Esculentum (Tomato) Lectin DyLight $^{\circledR}$  594 (1:400, Vector Labs). Sections were washed again three times in PBS, mounted and coverslipped with ProLong Diamond Antifade Mountant (Invitrogen). Thirty-micrometer-thick  $z$ -stack images of the PFC were acquired on a LSM-700 confocal microscope (Carl Zeiss). Images were taken using a 10 $\times$  and 20 $\times$  lens with a resolution of 1,532  $\times$  1532 and 1276 $\times$ 1276 $\times$ , respectively. Pixel size was 0.42  $\mu\text{m}$  and 0.25  $\mu\text{m}$  in the  $x$ - $y$ - $z$  planes, pixel dwell time was 0.58  $\mu\text{s}$  and 1.02  $\mu\text{s}$ , respectively, and the line average was set at 1. For positive control of BBB leakiness, Alexa Fluor 488-dextran (10 kDa)

was retro-orbitally injected and allowed to circulate for 30 min. Five min before sacrifice, 0.1 mL of mannitol (1.6 M) diluted in saline was intravenously injected<sup>59,60</sup> followed by perfusion with ice-cold 0.1 M PBS and 4% PFA and then processed for immunostaining as described above.

**Human post-mortem tissue collection.** Human brains were collected and NAc or PFC tissue samples dissected by the Suicide section of the Douglas-Bell Canada Brain Bank under approval of the institution's Research Ethics Board, and as described previously<sup>7,8</sup>. Blood toxicology was performed and subjects with evidence of drugs or psychotropic medications were excluded. Subjects with a known history of neurological disorders or head injury were also excluded. Demographic characteristics associated with each sample are listed in Supplementary Table 3. Clinical records and interviews were obtained for each case and reviewed by three or four mental health professionals to establish independent diagnoses followed by a consensus diagnosis in line with the Diagnostic and Statistical Manual of Mental Disorders (DSM) IV criteria. Groups were matched as closely as possible for gender, age, race, pH, post-mortem interval, and RNA integrity number<sup>7-9</sup>. All experiments were performed with the approval of Université Laval and CERVO Brain Research Center Ethics Committee.

**Stereotaxic surgery and viral gene transfer.** All surgeries were performed under aseptic conditions using anesthetic as described previously<sup>7,57</sup>. Mice were anesthetized with a mixture of ketamine (100 mg/kg of body weight) and xylazine (10 mg/kg of body weight) and positioned in a small animal stereotaxic instrument (Harvard Apparatus). The skull surface was exposed, and 30-gauge syringe needles (Hamilton Co.) were used to bilaterally infuse 0.5  $\mu$ l of virus ( $1.0 \times 10^{11}$  infectious unit/mL) expressing either AAV2/9-shRNA or AAV2/9-shRNA-*cldn5*<sup>7,24</sup>

into the PFC (bregma coordinates: anteroposterior +1.80 mm, mediolateral  $\pm$ 0.35 mm, dorsoventral  $-2.35$  mm) at a rate of  $0.1 \mu\text{L}/\text{min}$ . All mice were allowed to recover for 1 week before a 21-day activation of the viruses with doxycycline treatment ( $2 \text{ mg}/\text{mL}$  in drinking water).

**MACS of Endothelial Cells.** PFC samples were collected following behavioral assessment as described previously<sup>7</sup> or following SCVS. Bilateral 2 mm punches were collected from two adjacent 1 mm coronal slices on wet ice after rapid decapitation and immediately processed for MACS purification<sup>8</sup>. Endothelial cells were enriched from PFC punches by using MACS according to the manufacturer's protocol (Miltenyi Biotec). Briefly, brain punches were dissociated using a neuronal tissue dissociation kit (Miltenyi Biotec, 130-092-628), applied on a  $70\text{-}\mu\text{m}$  MACS smart strainer and washed with HBSS  $1\times$ . Thereafter, cells were magnetically labeled with CD45 microbeads (Miltenyi Biotec, 130052301) and passed through a MACS MS column (Miltenyi Biotec, 130-042-201) to proceed to negative selection of CD45 cells. CD45 $-$  fraction was collected and magnetically labeled with CD31 microbeads (Miltenyi Biotec, 139097418) and then passed through MACS MS column to positively select CD31 $+$  cells. CD45 $-$ , CD31 $+$  cells were resuspended in  $200 \mu\text{L}$  of TRIzol for RNA extraction and transcriptome-wide gene-level expression profiling.

### **Affymetrix Clariom S Transcriptome-wide Gene-Level Expression Profiling**

Samples were shipped to Genome Quebec for RNA extraction, quality control with the Bioanalyzer, and gene expression analysis with the Affymetrix Clariom S Pico assay for mouse (Thermo Fisher Scientific). Gene expression analysis was performed with the Transcriptome Analysis Console 4.0 provided by Thermo Fisher with the Clariom S assay according to the

manufacturer's instructions. To identify significant changes between groups, filters were set at fold change  $\pm 2$  and  $P < 0.05$ .

**Flow cytometry of endothelial cells.** Cell fractions obtained following MACS were processed as previously described<sup>8</sup>. Briefly, original, CD45<sup>-</sup>, CD45<sup>+</sup>, CD45<sup>-</sup> CD31<sup>-</sup>, and CD45<sup>-</sup> CD31<sup>+</sup> cell fraction aliquots were incubated with anti-CD16/32 (BioLegend, 14-0161-82) to block Fc receptors. Cells were then labeled with CD45 APC (BioLegend, 103111) and CD31 PE-CF594 (BD Biosciences, 653616). A viability dye (LIVE/DEAD fixable green, Molecular Probes, L34969) was added to the previous panels to discriminate live cells. Endothelial cells from mouse brain PFC punches were identified as CD45<sup>-</sup> and CD31<sup>+</sup> cells. All analyses were performed on BD LSR II and data were analyzed with FACS Diva software (BD Biosciences).

**Blood collection and serum extraction.** Blood samples were collected 72h before the start of CSDS and SCVS protocols by submandibular bleeding method. Trunk blood was also collected during tissue collection. Blood was allowed to clot for at least 1h before being centrifuged at 10 000 RPM at RT for 2 min. Supernatant was collected and spun again at 3000 RPM for 10 min. Supernatant (serum) was collected, aliquoted and stored at -80°C until use.

**Milliplex Assays for mouse serum.** MILLIPLEX® 96-Well Plate Assays were performed according to the manufacturer's protocol (EMD Millipore). Briefly, the plate was prepped using 200  $\mu$ L Assay Buffer per well for 10 mins on a plate shaker, at room temperature (RT). Then, 25  $\mu$ L of each Standards and Controls were added to the appropriate wells, before adding 25  $\mu$ L of each sample (diluted 1:20 #MCVD1MAG-77k in Assay Buffer) in duplicates to the rest of the

plate, vertically. Then, 25  $\mu$ L of Antibody-Immobilized Beads were added to each well before being incubated on a plate shaker overnight at 4°C. The following morning, the plate was washed 3x using a handheld magnet, before adding 25  $\mu$ L of Detection Antibodies and incubating on a plate shaker for 1h at RT. Streptavidin-Phycoerythrin was added to each well and incubated once more at RT for 30 mins. Finally, the plate was washed 3x and resuspended for 5 mins on a plate shaker at RT in 150  $\mu$ L of Sheath Fluid. The plate was read on a Luminex® 200™ plate reader.

**Human serum sample collection.** All human blood samples were provided by Signature Bank from the Centre de recherche de l'Institut universitaire en santé mentale de Montréal (CR-IUSMM) under approval of the institution's Ethics Committee. Samples from depressed volunteers were collected at the emergency room of the Institut universitaire en santé mentale de Montréal of CIUSSS de l'Est-de-Montreal and samples from healthy volunteers at the CR-IUSMM. Subjects with known history of drug abuse were excluded. Demographic characteristics associated with each sample are listed in Supplementary Table 4. Depressive behaviors were assessed by the Patient Health Questionnaire (PHQ-9), which scores each of the nine Diagnostic and Statistical Manual of Mental Disorders (DSM) IV criteria<sup>61</sup>. All experiments were performed under the approval of Université Laval and CERVO Brain Research Center Ethics Committee.

**ELISA for human serum.** Human soluble E-selectin levels were assayed using quantitative sandwich enzyme immunoassay technique and following the manufacturer's protocol (Quantikine ELISA Human E-selectin/CD62E Immunoassay, DSLE00, R&D Systems). Briefly, assay diluent was added to each well, before adding standards and samples (diluted 1:10) in triplicates and incubating for 2h at RT. The plate was washed 4 times with wash buffer and Human E-selectin



Conjugate was added to each well, before incubating again for 2h at RT. After 4 more washes, the Substrate Solution was added and incubated in the dark for 30 mins, before stopping the reaction with the Stop Solution. Optical density of the plate was read at 450 nanometers (nm) with wavelength correction at 570 nm on a plate reader. Data was reduced against a four-parameter logistic curve using the Gen 5.0 software and samples with a coefficient of variation above 15% were removed from the analysis. The intra-assay variability of the assay ranged from 5.1-6.9% and the inter-assay variability ranged from 7.3-8.6%; mean assay sensitivity was 0.009 ng/mL.

**Statistical analysis.** Sample size for CSDS and SCVS mouse cohorts was calculated based on previous studies<sup>7,8,15,57</sup>. Outliers for social interaction (SI) test screening were identified as being greater than 2 SD from the mean and excluded. All mice were assigned to stress-susceptible (SS) or resilient (RES) groups based on their behavioral profile when compared to unstressed controls (CTRL). SI screening and behavioral tests were performed with automated tracking systems when possible. If not (for splash test, sucrose preference test and forced swim test), scoring was done by experimenters blinded to experimental conditions. Outliers for behavioral testing—for example, those characterized by impaired locomotion—were identified as being greater than 2 SD from the mean and excluded from statistical analysis. An animal found to be an outlier for 2 or more behavioral tests was completely removed from all analysis. All *t*-tests, one-way ANOVAs, two-way ANOVAs and Pearson's correlations were performed using GraphPad Prism software (GraphPad Software Inc.). Statistical significance was set at  $P < 0.05$ . Bonferroni was used as a post hoc test when appropriate for one-way and two-way ANOVAs and statistical significance was set at  $P < 0.05$ . Detailed statistics are presented in the Supplementary Data. Visual representation of average and SEM with heat maps was done using Matlab-based software. Individual values

were used to compute correlation matrices and *P* values were determined by Matlab-based software. Normality was generally determined by Kolmogorov–Smirnov, D’Agostino–Pearson and Shapiro–Wilk normality tests using GraphPad Prism software. All quantitative PCR, immunohistochemistry and transcriptional quantification were performed in duplicate in at least two different cohorts of mice.

## References

- 1 Menard, C., Pfau, M. L., Hodes, G. E. & Russo, S. J. Immune and Neuroendocrine Mechanisms of Stress Vulnerability and Resilience. *Neuropsychopharmacology* **42**, 62-80, doi:10.1038/npp.2016.90 (2017).
- 2 Kessler, R. C., Chiu, W. T., Demler, O., Merikangas, K. R. & Walters, E. E. Prevalence, severity, and comorbidity of 12-month DSM-IV disorders in the National Comorbidity Survey Replication. *Arch Gen Psychiatry* **62**, 617-627, doi:10.1001/archpsyc.62.6.617 (2005).
- 3 Woelbert, E., Lundell-Smith, K., White, R. & Kemmer, D. Accounting for mental health research funding: developing a quantitative baseline of global investments. *Lancet Psychiatry*, doi:10.1016/S2215-0366(20)30469-7 (2020).
- 4 Seligman, F. & Nemeroff, C. B. The interface of depression and cardiovascular disease: therapeutic implications. *Ann NY Acad Sci* **1345**, 25-35, doi:10.1111/nyas.12738 (2015).
- 5 Carney, R. M. & Freedland, K. E. Depression and coronary heart disease. *Nat Rev Cardiol* **14**, 145-155, doi:10.1038/nrcardio.2016.181 (2017).
- 6 Wood, S. K. Individual differences in the neurobiology of social stress: implications for depression-cardiovascular disease comorbidity. *Curr Neuropharmacol* **12**, 205-211, doi:10.2174/1570159X11666131120224413 (2014).
- 7 Menard, C. *et al.* Social stress induces neurovascular pathology promoting depression. *Nat Neurosci* **20**, 1752-1760, doi:10.1038/s41593-017-0010-3 (2017).
- 8 Dudek, K. A. *et al.* Molecular adaptations of the blood-brain barrier promote stress resilience vs. depression. *Proc Natl Acad Sci U S A* **117**, 3326-3336, doi:10.1073/pnas.1914655117 (2020).
- 9 Labonte, B. *et al.* Sex-specific transcriptional signatures in human depression. *Nat Med* **23**, 1102-1111, doi:10.1038/nm.4386 (2017).
- 10 Martin, L. A., Neighbors, H. W. & Griffith, D. M. The experience of symptoms of depression in men vs women: analysis of the National Comorbidity Survey Replication. *JAMA Psychiatry* **70**, 1100-1106, doi:10.1001/jamapsychiatry.2013.1985 (2013).
- 11 Seney, M. L. *et al.* Opposite Molecular Signatures of Depression in Men and Women. *Biol Psychiatry* **84**, 18-27, doi:10.1016/j.biopsych.2018.01.017 (2018).
- 12 Kessler, R. C. *et al.* Lifetime prevalence and age-of-onset distributions of DSM-IV disorders in the National Comorbidity Survey Replication. *Arch Gen Psychiatry* **62**, 593-602, doi:10.1001/archpsyc.62.6.593 (2005).
- 13 Garcia, M., Mulvagh, S. L., Merz, C. N., Buring, J. E. & Manson, J. E. Cardiovascular Disease in Women: Clinical Perspectives. *Circ Res* **118**, 1273-1293, doi:10.1161/CIRCRESAHA.116.307547 (2016).
- 14 Golden, S. A., Covington, H. E., 3rd, Berton, O. & Russo, S. J. A standardized protocol for repeated social defeat stress in mice. *Nat Protoc* **6**, 1183-1191, doi:10.1038/nprot.2011.361 (2011).
- 15 Hodes, G. E. *et al.* Sex Differences in Nucleus Accumbens Transcriptome Profiles Associated with Susceptibility versus Resilience to Subchronic Variable Stress. *J Neurosci* **35**, 16362-16376, doi:10.1523/JNEUROSCI.1392-15.2015 (2015).
- 16 Meltzer, H., Vostanis, P., Ford, T., Bebbington, P. & Dennis, M. S. Victims of bullying in childhood and suicide attempts in adulthood. *Eur Psychiatry* **26**, 498-503, doi:10.1016/j.eurpsy.2010.11.006 (2011).

- 17 Segarra, M., Aburto, M. R. & Acker-Palmer, A. Blood-Brain Barrier Dynamics to Maintain Brain Homeostasis. *Trends Neurosci*, doi:10.1016/j.tins.2020.12.002 (2021).
- 18 Profaci, C. P., Munji, R. N., Pulido, R. S. & Daneman, R. The blood-brain barrier in health and disease: Important unanswered questions. *J Exp Med* **217**, doi:10.1084/jem.20190062 (2020).
- 19 Harris, A. Z. *et al.* A Novel Method for Chronic Social Defeat Stress in Female Mice. *Neuropsychopharmacology* **43**, 1276-1283, doi:10.1038/npp.2017.259 (2018).
- 20 Russo, S. J. & Nestler, E. J. The brain reward circuitry in mood disorders. *Nat Rev Neurosci* **14**, 609-625, doi:10.1038/nrn3381 (2013).
- 21 Takahashi, A. *et al.* Establishment of a repeated social defeat stress model in female mice. *Sci Rep* **7**, 12838, doi:10.1038/s41598-017-12811-8 (2017).
- 22 Nitta, T. *et al.* Size-selective loosening of the blood-brain barrier in claudin-5-deficient mice. *J Cell Biol* **161**, 653-660, doi:10.1083/jcb.200302070 (2003).
- 23 Vanlandewijck, M. *et al.* A molecular atlas of cell types and zonation in the brain vasculature. *Nature* **554**, 475-480, doi:10.1038/nature25739 (2018).
- 24 Campbell, M. *et al.* Systemic low-molecular weight drug delivery to pre-selected neuronal regions. *EMBO Mol Med* **3**, 235-245, doi:10.1002/emmm.201100126 (2011).
- 25 Ouellette, J. *et al.* Vascular contributions to 16p11.2 deletion autism syndrome modeled in mice. *Nat Neurosci* **23**, 1090-1101, doi:10.1038/s41593-020-0663-1 (2020).
- 26 Levenberg, S., Ferreira, L. S., Chen-Konak, L., Kraehenbuehl, T. P. & Langer, R. Isolation, differentiation and characterization of vascular cells derived from human embryonic stem cells. *Nat Protoc* **5**, 1115-1126, doi:10.1038/nprot.2010.31 (2010).
- 27 Sutermeister, B. A. & Darling, E. M. Considerations for high-yield, high-throughput cell enrichment: fluorescence versus magnetic sorting. *Sci Rep* **9**, 227, doi:10.1038/s41598-018-36698-1 (2019).
- 28 Shimizu, F. *et al.* Pericyte-derived glial cell line-derived neurotrophic factor increase the expression of claudin-5 in the blood-brain barrier and the blood-nerve barrier. *Neurochem Res* **37**, 401-409, doi:10.1007/s11064-011-0626-8 (2012).
- 29 Dudek, K. A. *et al.* Neurobiology of resilience in depression: immune and vascular insights from human and animal studies. *Eur J Neurosci* **53**, 183-221, doi:10.1111/ejn.14547 (2021).
- 30 McMillin, M. A. *et al.* TGFbeta1 exacerbates blood-brain barrier permeability in a mouse model of hepatic encephalopathy via upregulation of MMP9 and downregulation of claudin-5. *Lab Invest* **95**, 903-913, doi:10.1038/labinvest.2015.70 (2015).
- 31 Wang, Y. *et al.* Beta-catenin signaling regulates barrier-specific gene expression in circumventricular organ and ocular vasculatures. *Elife* **8**, doi:10.7554/eLife.43257 (2019).
- 32 Parrado-Fernandez, C. *et al.* Evidence for sex difference in the CSF/plasma albumin ratio in ~20 000 patients and 335 healthy volunteers. *J Cell Mol Med* **22**, 5151-5154, doi:10.1111/jcmm.13767 (2018).
- 33 Weber, C. M. & Clyne, A. M. Sex differences in the blood-brain barrier and neurodegenerative diseases. *APL Bioeng* **5**, 011509, doi:10.1063/5.0035610 (2021).
- 34 Scarpa, J. R. *et al.* Shared Transcriptional Signatures in Major Depressive Disorder and Mouse Chronic Stress Models. *Biol Psychiatry* **88**, 159-168, doi:10.1016/j.biopsych.2019.12.029 (2020).

- 35 Johnson, A., Rainville, J. R., Rivero-Ballon, G. N., Dhimitri, K. & Hodes, G. E. Testing the Limits of Sex Differences Using Variable Stress. *Neuroscience* **454**, 72-84, doi:10.1016/j.neuroscience.2019.12.034 (2021).
- 36 Kong, L. *et al.* Sex differences of gray matter morphology in cortico-limbic-striatal neural system in major depressive disorder. *J Psychiatr Res* **47**, 733-739, doi:10.1016/j.jpsychires.2013.02.003 (2013).
- 37 Greene, C., Hanley, N. & Campbell, M. Blood-brain barrier associated tight junction disruption is a hallmark feature of major psychiatric disorders. *Transl Psychiatry* **10**, 373, doi:10.1038/s41398-020-01054-3 (2020).
- 38 Nishiura, K. *et al.* PKA activation and endothelial claudin-5 breakdown in the schizophrenic prefrontal cortex. *Oncotarget* **8**, 93382-93391, doi:10.18632/oncotarget.21850 (2017).
- 39 Hwang, Y. *et al.* Gene expression profiling by mRNA sequencing reveals increased expression of immune/inflammation-related genes in the hippocampus of individuals with schizophrenia. *Transl Psychiatry* **3**, e321, doi:10.1038/tp.2013.94 (2013).
- 40 Jiang, D. *et al.* Elevated PLA2G7 gene promoter methylation as a gender-specific marker of aging increases the risk of coronary heart disease in females. *PLoS One* **8**, e59752, doi:10.1371/journal.pone.0059752 (2013).
- 41 Nasca, C. *et al.* Acetyl-L-carnitine deficiency in patients with major depressive disorder. *Proc Natl Acad Sci U S A* **115**, 8627-8632, doi:10.1073/pnas.1801609115 (2018).
- 42 Kim-Schulze, S. *et al.* Expression of an estrogen receptor by human coronary artery and umbilical vein endothelial cells. *Circulation* **94**, 1402-1407, doi:10.1161/01.cir.94.6.1402 (1996).
- 43 Cid, M. C., Schnaper, H. W. & Kleinman, H. K. Estrogens and the vascular endothelium. *Ann N Y Acad Sci* **966**, 143-157, doi:10.1111/j.1749-6632.2002.tb04211.x (2002).
- 44 Burek, M., Arias-Loza, P. A., Roewer, N. & Forster, C. Y. Claudin-5 as a novel estrogen target in vascular endothelium. *Arterioscler Thromb Vasc Biol* **30**, 298-304, doi:10.1161/ATVBAHA.109.197582 (2010).
- 45 Shansky, R. M. *et al.* Estrogen mediates sex differences in stress-induced prefrontal cortex dysfunction. *Mol Psychiatry* **9**, 531-538, doi:10.1038/sj.mp.4001435 (2004).
- 46 Yoest, K. E., Quigley, J. A. & Becker, J. B. Rapid effects of ovarian hormones in dorsal striatum and nucleus accumbens. *Horm Behav* **104**, 119-129, doi:10.1016/j.yhbeh.2018.04.002 (2018).
- 47 Sas, L. *et al.* The interaction between ER and NFkappaB in resistance to endocrine therapy. *Breast Cancer Res* **14**, 212, doi:10.1186/bcr3196 (2012).
- 48 Miklowitz, D. J. *et al.* Inflammatory cytokines and nuclear factor-kappa B activation in adolescents with bipolar and major depressive disorders. *Psychiatry Res* **241**, 315-322, doi:10.1016/j.psychres.2016.04.120 (2016).
- 49 Sawicki, C. M. *et al.* Social defeat promotes a reactive endothelium in a brain region-dependent manner with increased expression of key adhesion molecules, selectins and chemokines associated with the recruitment of myeloid cells to the brain. *Neuroscience* **302**, 151-164, doi:10.1016/j.neuroscience.2014.10.004 (2015).
- 50 Gorska-Ciebiada, M., Saryusz-Wolska, M., Borkowska, A., Ciebiada, M. & Loba, J. Serum Soluble Adhesion Molecules and Markers of Systemic Inflammation in Elderly Diabetic Patients with Mild Cognitive Impairment and Depressive Symptoms. *Biomed Res Int* **2015**, 826180, doi:10.1155/2015/826180 (2015).

- 51 Kamintsky, L. *et al.* Blood-brain barrier imaging as a potential biomarker for bipolar disorder progression. *Neuroimage Clin* **26**, 102049, doi:10.1016/j.nicl.2019.102049 (2020).
- 52 Nagy, C. *et al.* Single-nucleus transcriptomics of the prefrontal cortex in major depressive disorder implicates oligodendrocyte precursor cells and excitatory neurons. *Nat Neurosci* **23**, 771-781, doi:10.1038/s41593-020-0621-y (2020).
- 53 Nation, D. A. *et al.* Blood-brain barrier breakdown is an early biomarker of human cognitive dysfunction. *Nat Med* **25**, 270-276, doi:10.1038/s41591-018-0297-y (2019).
- 54 Marshe, V. S. *et al.* Genome-wide analysis suggests the importance of vascular processes and neuroinflammation in late-life antidepressant response. *Transl Psychiatry* **11**, 127, doi:10.1038/s41398-021-01248-3 (2021).
- 55 Barry, L. C., Allore, H. G., Guo, Z., Bruce, M. L. & Gill, T. M. Higher burden of depression among older women: the effect of onset, persistence, and mortality over time. *Arch Gen Psychiatry* **65**, 172-178, doi:10.1001/archgenpsychiatry.2007.17 (2008).
- 56 Byers, S. L., Wiles, M. V., Dunn, S. L. & Taft, R. A. Mouse estrous cycle identification tool and images. *PLoS One* **7**, e35538, doi:10.1371/journal.pone.0035538 (2012).
- 57 Golden, S. A. *et al.* Epigenetic regulation of RAC1 induces synaptic remodeling in stress disorders and depression. *Nat Med* **19**, 337-344, doi:10.1038/nm.3090 (2013).
- 58 LaPlant, Q. *et al.* Role of nuclear factor kappaB in ovarian hormone-mediated stress hypersensitivity in female mice. *Biol Psychiatry* **65**, 874-880, doi:10.1016/j.biopsych.2009.01.024 (2009).
- 59 Cosolo, W. C., Martinello, P., Louis, W. J. & Christophidis, N. Blood-brain barrier disruption using mannitol: time course and electron microscopy studies. *Am J Physiol* **256**, R443-447, doi:10.1152/ajpregu.1989.256.2.R443 (1989).
- 60 Bhattacharjee, A. K., Nagashima, T., Kondoh, T. & Tamaki, N. Quantification of early blood-brain barrier disruption by in situ brain perfusion technique. *Brain Res Brain Res Protoc* **8**, 126-131, doi:10.1016/s1385-299x(01)00094-0 (2001).
- 61 Kroenke, K., Spitzer, R. L. & Williams, J. B. The PHQ-9: validity of a brief depression severity measure. *J Gen Intern Med* **16**, 606-613, doi:10.1046/j.1525-1497.2001.016009606.x (2001).

## Acknowledgements

The authors thank Valerie Catudal and Melissa Murillo Radtke from Genome Quebec as well as the CERVO Brain Research Centre housing facility staff for their work and support. This research was supported by the Canadian Institutes for Health Research (CIHR, Project Grant #427011 to C.M.), Fonds de recherche du Quebec – Sante (FRQS, Junior 1 Salary Award to C.M.) and C.M. Sentinel North Research Chair funded by Canada First Research Excellence Fund. L.F.P. and F.C.



are supported by a National Institute of Health grant R01MH104559. M.C. is supported by grants from the European Research Council (ERC: Retina-Rhythm), The Irish Research Council (IRC), and an SFI Centres grant supported in part by a research grant from SFI under grant number 16/RC/3948 and co-funded under the European Regional Development fund by FutureNeuro industry partners. L.D.A., F.N.K., K.A.D. and F.C. are supported by scholarships or fellowships from CIHR, Sentinel North, FRQS, and the Swiss National Science Foundation, respectively. The Douglas-Bell Canada Brain Bank is funded by the RQSHA (FRQS) and a platform support grant from Healthy Brain Healthy Lives (Canada First Research Excellence Fund).

### **Author Contributions**

L.D.A and C.M. designed research; L.D.A, A.C., E.D., F.N.K., K.A.D., L.F.P., F.C., N.S., M.L. performed research including behavioral experiments, stereotaxic surgeries, molecular, biochemical, and morphological analysis; N.H. and M.C. provided the AAVs for functional experiments; the Signature Consortium contributed the human blood samples and related demographic data while G.T. and N.M. obtained, characterized and prepared the *postmortem* human samples and related data; L.D.A and C.M. analysed the data and wrote the manuscript which was edited by all authors.

### **Author Information**

<sup>1</sup>Department of Psychiatry and Neuroscience, Université Laval and CERVO Brain Research Center, 2601 de la Canardiere, Quebec City, QC (Canada)

<sup>2</sup>Fishberg Department of Neuroscience and the Friedman Brain Institute, Icahn School of Medicine at Mount Sinai, New York, NY, USA

<sup>3</sup>Sorbonne Université, Paris (France)

<sup>4</sup>Smurfit Institute of Genetics, Trinity College Dublin, Lincoln Place Gate, Dublin 2 (Ireland)

<sup>5</sup>Institut universitaire en santé mentale de Montréal, Centre intégré universitaire de santé et service sociaux Est, Montreal, QC (Canada)

<sup>6</sup>Department of Psychiatry, McGill University and Douglas Mental Health University Institute, Montreal, QC (Canada)

**Corresponding author:**

\*Caroline Menard, PhD, CERVO Brain Research Center, Department of Psychiatry and Neuroscience, Faculty of Medicine, Université Laval, 2601 de la Canardiere, Quebec City, QC, Canada, G2J 2G3, [caroline.menard@fmed.ulaval.ca](mailto:caroline.menard@fmed.ulaval.ca)

**Competing financial interests**

The authors wish to declare no competing financial interest.
